# Supplementary material for: Association between confirmed congenital Zika infection at birth and outcomes up to 3 years of life
Source: PubMed Central journal article supplement (PMC8169933; doi:10.1038/s41467-021-23468-3), 2021-06-01
Supplement: 41467_2021_23468_MOESM1_ESM.pdf [file 41467_2021_23468_MOESM1_ESM.pdf]

```

name: <unnamed>
log: \\HOME\lpomar\Mes Documents\Zika_enfants-Guyane\Nature\R1\Dataset\Table1.log
log type: text
opened on: 23 Mar 2021, 11:49:29

```

```

. ** Table 1: Baseline characteristics
. import excel "\\HOME\lpomar\Mes Documents\Zika_enfants-Guyane\Nature\R1\Dataset\Source Data.xlsx",
sheet("Table 1") firstrow
(24 vars, 132 obs)

```

```

. destring Laboratoryconfirm, replace
LaboratoryconfirmedCongenital: all characters numeric; replaced as byte
(3 missing values generated)

```

```

. tab Laboratoryconfirm

```

| Laboratory confirmed<br>Congenital<br>ZIKA<br>infection | Freq. | Percent | Cum.   |
|---------------------------------------------------------|-------|---------|--------|
| 0                                                       | 111   | 86.05   | 86.05  |
| 1                                                       | 18    | 13.95   | 100.00 |
| Total                                                   | 129   | 100.00  |        |

```

. * Maternal age:
. codebook Maternalage if Laboratoryconfirm==1

```

```

-----
Maternalageatbirthyears                                Maternal age
at birth (years)
-----

```

```

type: numeric (byte)

```

```

range: [18,38]          units: 1
unique values: 11      missing .: 0/18

```

```

mean: 25.8889
std. dev: 6.25807

```

```

percentiles:    10%    25%    50%    75%    90%
                19     20     25     30     38

```

```

. codebook Maternalage if Laboratoryconfirm==0

```

Maternalageatbirthyears  
at birth (years)

Maternal age

type: numeric (byte)

range: [18,43]                      units: 1  
unique values: 21                    missing :: 0/111

mean: 26.5045  
std. dev: 6.06161

percentiles:    10%    25%    50%    75%    90%  
                  19    23    26    29    37

. ranksum Maternalage, by(Laboratoryconfirm)

Two-sample Wilcoxon rank-sum (Mann-Whitney) test

Laboratory~1 |    obs    rank sum    expected

-----+-----  
0 |    111    7295    7215  
1 |    18    1090    1170

-----+-----  
combined |    129    8385    8385

unadjusted variance    21645.00  
adjustment for ties    -150.83

-----  
adjusted variance    21494.17

Ho: Matern~s(Labora~l==0) = Matern~s(Labora~l==1)

z = 0.546

Prob > |z| = 0.5853

Exact Prob = 0.5895

. stddiff Maternalage, by(Laboratoryconfirm)

-----+-----  
|LaboratoryconfirmedCon~0 |LaboratoryconfirmedCon~1 |  
| Mean or N    SD or (%) | Mean or N    SD or (%) | Std Diff

-----+-----  
Maternalag~s |    26.5    6.0616 |    25.89    6.2581 |    0.09993

. \* Maternal socio-economic status

. tab Socioeconomics if Laboratoryconfirm==1, freq

Socio-econo |

mic status |    Freq.    Percent    Cum.

-----+-----  
. |    3    16.67    16.67  
H |    1    5.56    22.22  
L |    6    33.33    55.56  
M |    8    44.44    100.00

```
-----+-----
Total |      18   100.00
```

```
. tab Socioeconomics if Laboratoryconfirm==0, freq
```

```
Socio-econo |
mic status |   Freq.   Percent   Cum.
-----+-----
. |      19   17.12   17.12
H |       8    7.21   24.32
L |      38   34.23   58.56
M |      46   41.44  100.00
-----+-----
Total |     111  100.00
```

```
. gen se_low=0
```

```
. replace se_low=1 if Socioeconomics=="L"
(45 real changes made)
```

```
. tab se_low Laboratoryconfirm, chi2
```

```
      | Laboratory confirmed
      | Congenital ZIKA
      | infection
se_low |      0      1 | Total
-----+-----
0 |      73     12 |     85
1 |      38      6 |     44
-----+-----
Total |     111     18 |    129
```

Pearson chi2(1) = 0.0056 Pr = 0.940

```
. stddiff se_low, by(Laboratoryconfirm)
```

```
-----+-----
|LaboratoryconfirmedCon~0 |LaboratoryconfirmedCon~1 |
| Mean or N   SD or (%) | Mean or N   SD or (%) | Std Diff
-----+-----+-----+-----+-----
se low |   .3423   .47665 | .3333   .48507 | 0.01873
-----+-----+-----+-----+-----
```

```
. gen se_mod=0
```

```
. replace se_mod=1 if Socioeconomics=="M"
(56 real changes made)
```

```
. tab se_mod Laboratoryconfirm, chi2
```

```
      | Laboratory confirmed
      | Congenital ZIKA
      | infection
se_mod |      0      1 | Total
-----+-----
0 |      65     10 |     75
1 |      46      8 |     54
```

```
-----+-----+-----
Total | 111 18 | 129
```

Pearson chi2(1) = 0.0574 Pr = 0.811

```
. stddiff se_mod, by(Laboratoryconfirm)
```

```
-----+-----+-----
|LaboratoryconfirmedCon~0 |LaboratoryconfirmedCon~1 |
| Mean or N SD or (%) | Mean or N SD or (%) | Std Diff
-----+-----+-----
se mod | .4144 .49485 | .4444 .51131 | -0.05968
-----+-----+-----
```

```
. gen se_hi=0
```

```
. replace se_hi=1 if Socioeconomics=="H"
(9 real changes made)
```

```
. tab se_hi Laboratoryconfirm, exact
```

```

| Laboratory confirmed
| Congenital ZIKA
| infection
se_hi | 0 1 | Total
-----+-----+-----
0 | 103 17 | 120
1 | 8 1 | 9
-----+-----+-----
Total | 111 18 | 129
```

```
Fisher's exact = 1.000
1-sided Fisher's exact = 0.634
```

```
. stddiff se_hi, by(Laboratoryconfirm)
```

```
-----+-----+-----
|LaboratoryconfirmedCon~0 |LaboratoryconfirmedCon~1 |
| Mean or N SD or (%) | Mean or N SD or (%) | Std Diff
-----+-----+-----
se hi | .07207 .25978 | .05556 .2357 | 0.06659
-----+-----+-----
```

```
. gen se_unk=0
```

```
. replace se_unk=1 if Socioeconomics=="."
(22 real changes made)
```

```
. tab se_unk Laboratoryconfirm, chi2
```

```

| Laboratory confirmed
| Congenital ZIKA
| infection
se_unk | 0 1 | Total
-----+-----+-----
0 | 92 15 | 107
1 | 19 3 | 22
```

```
-----+-----+-----
Total |    111    18 |    129
```

Pearson chi2(1) = 0.0022 Pr = 0.962

```
. stddiff se_unk, by(Laboratoryconfirm)
```

```
-----+-----+-----
|LaboratoryconfirmedCon~0 |LaboratoryconfirmedCon~1 |
| Mean or N   SD or (%) | Mean or N   SD or (%) | Std Diff
-----+-----+-----
se unk |   .1712    .37837 |   .1667    .38348 |   0.01182
-----+-----+-----
```

```
. * Maternal Exposures:
```

```
. tab Alcohol if Laboratoryconfirm==1, freq
```

```
Alcohol |   Freq.   Percent   Cum.
-----+-----+-----
0 |      17   94.44   94.44
1 |       1    5.56  100.00
-----+-----+-----
Total |      18  100.00
```

```
. tab Alcohol if Laboratoryconfirm==0, freq
```

```
Alcohol |   Freq.   Percent   Cum.
-----+-----+-----
0 |      99   89.19   89.19
1 |      12   10.81  100.00
-----+-----+-----
Total |     111  100.00
```

```
. tab Alcohol Laboratoryconfirm, exact
```

```
   | Laboratory confirmed
   | Congenital ZIKA
   | infection
Alcohol |    0    1 | Total
-----+-----+-----
0 |    99   17 |   116
1 |    12    1 |    13
-----+-----+-----
Total |   111   18 |   129
```

Fisher's exact = 0.692

1-sided Fisher's exact = 0.429

```
. stddiff Alcohol, by(Laboratoryconfirm)
```

```
-----+-----+-----
|LaboratoryconfirmedCon~0 |LaboratoryconfirmedCon~1 |
| Mean or N   SD or (%) | Mean or N   SD or (%) | Std Diff
-----+-----+-----
Alcohol |   .1081    .31193 |   .05556    .2357 |   0.19010
-----+-----+-----
```

. tab Drug if Laboratoryconfirm==1, freq

| Drug  | Freq. | Percent | Cum.   |
|-------|-------|---------|--------|
| 0     | 18    | 100.00  | 100.00 |
| Total | 18    | 100.00  |        |

. tab Drug if Laboratoryconfirm==0, freq

| Drug  | Freq. | Percent | Cum.   |
|-------|-------|---------|--------|
| 0     | 110   | 99.10   | 99.10  |
| 1     | 1     | 0.90    | 100.00 |
| Total | 111   | 100.00  |        |

. tab Drug Laboratoryconfirm, exact

| Drug  | Laboratory confirmed<br>Congenital ZIKA<br>infection |    | Total |
|-------|------------------------------------------------------|----|-------|
|       | 0                                                    | 1  |       |
| 0     | 110                                                  | 18 | 128   |
| 1     | 1                                                    | 0  | 1     |
| Total | 111                                                  | 18 | 129   |

Fisher's exact = 1.000  
1-sided Fisher's exact = 0.860

. stddiff Drug, by(Laboratoryconfirm)

| Drug | LaboratoryconfirmedCon~0 |           | LaboratoryconfirmedCon~1 |           | Std Diff |
|------|--------------------------|-----------|--------------------------|-----------|----------|
|      | Mean or N                | SD or (%) | Mean or N                | SD or (%) |          |
| 0    | .009009                  | .094916   | 0                        | 0         | 0.13423  |

. tab Smoking if Laboratoryconfirm==1, freq

| Smoking | Freq. | Percent | Cum.   |
|---------|-------|---------|--------|
| 0       | 17    | 94.44   | 94.44  |
| 1       | 1     | 5.56    | 100.00 |
| Total   | 18    | 100.00  |        |

. tab Smoking if Laboratoryconfirm==0, freq

| Smoking | Freq. | Percent | Cum.  |
|---------|-------|---------|-------|
| 0       | 105   | 95.45   | 95.45 |

|       |     |        |        |
|-------|-----|--------|--------|
| 1     | 5   | 4.55   | 100.00 |
| ----- |     |        |        |
| Total | 110 | 100.00 |        |

. tab Smoking Laboratoryconfirm, exact

| Laboratory confirmed<br>  Congenital ZIKA<br>  infection |     |    |       |
|----------------------------------------------------------|-----|----|-------|
| Smoking                                                  | 0   | 1  | Total |
| -----                                                    |     |    |       |
| 0                                                        | 105 | 17 | 122   |
| 1                                                        | 5   | 1  | 6     |
| -----                                                    |     |    |       |
| Total                                                    | 110 | 18 | 128   |

Fisher's exact = 1.000  
1-sided Fisher's exact = 0.605

. stddiff Smoking, by(Laboratoryconfirm)

| -----                    |           |                          |           |          |          |
|--------------------------|-----------|--------------------------|-----------|----------|----------|
| LaboratoryconfirmedCon~0 |           | LaboratoryconfirmedCon~1 |           |          |          |
| Mean or N                | SD or (%) | Mean or N                | SD or (%) | Std Diff |          |
| -----                    |           |                          |           |          |          |
| Smoking                  | .04545    | .20925                   | .05556    | .2357    | -0.04532 |
| -----                    |           |                          |           |          |          |

. tab Leadpois if Laboratoryconfirm==1, freq

| Lead poisoning | Freq. | Percent | Cum.   |
|----------------|-------|---------|--------|
| -----          |       |         |        |
| 0              | 17    | 94.44   | 94.44  |
| 1              | 1     | 5.56    | 100.00 |
| -----          |       |         |        |
| Total          | 18    | 100.00  |        |

. tab Leadpois if Laboratoryconfirm==0, freq

| Lead poisoning | Freq. | Percent | Cum.   |
|----------------|-------|---------|--------|
| -----          |       |         |        |
| 0              | 105   | 94.59   | 94.59  |
| 1              | 6     | 5.41    | 100.00 |
| -----          |       |         |        |
| Total          | 111   | 100.00  |        |

. tab Leadpois Laboratoryconfirm, exact

| Laboratory confirmed<br>  Congenital ZIKA<br>  infection |     |    |       |
|----------------------------------------------------------|-----|----|-------|
| Lead poisoning                                           | 0   | 1  | Total |
| -----                                                    |     |    |       |
| 0                                                        | 105 | 17 | 122   |

|       |     |    |     |
|-------|-----|----|-----|
| 1     | 6   | 1  | 7   |
| ----- |     |    |     |
| Total | 111 | 18 | 129 |

Fisher's exact = 1.000  
 1-sided Fisher's exact = 0.660

. stddiff Leadpois, by(Laboratoryconfirm)

|              | LaboratoryconfirmedCon~0 | LaboratoryconfirmedCon~1 |                                |
|--------------|--------------------------|--------------------------|--------------------------------|
|              | Mean or N                | SD or (%)                | Mean or N SD or (%)   Std Diff |
| -----        |                          |                          |                                |
| Leadpoison~g | .05405                   | .22715                   | .05556 .2357   -0.00649        |

. \* Maternal Comorbidities:

. tab Anymat if Laboratoryconfirm==1, freq

| Any         |       |         |        |
|-------------|-------|---------|--------|
| maternal    |       |         |        |
| comorbiditi |       |         |        |
| es          | Freq. | Percent | Cum.   |
| -----       |       |         |        |
| 0           | 15    | 83.33   | 83.33  |
| 1           | 3     | 16.67   | 100.00 |
| -----       |       |         |        |
| Total       | 18    | 100.00  |        |

. tab Anymat if Laboratoryconfirm==0, freq

| Any         |       |         |        |
|-------------|-------|---------|--------|
| maternal    |       |         |        |
| comorbiditi |       |         |        |
| es          | Freq. | Percent | Cum.   |
| -----       |       |         |        |
| 0           | 96    | 86.49   | 86.49  |
| 1           | 15    | 13.51   | 100.00 |
| -----       |       |         |        |
| Total       | 111   | 100.00  |        |

. tab Anymat Laboratoryconfirm, exact

| Any        | Laboratory confirmed |    |       |
|------------|----------------------|----|-------|
| maternal   | Congenital ZIKA      |    |       |
| comorbidit | infection            |    |       |
| ies        | 0                    | 1  | Total |
| -----      |                      |    |       |
| 0          | 96                   | 15 | 111   |
| 1          | 15                   | 3  | 18    |
| -----      |                      |    |       |
| Total      | 111                  | 18 | 129   |

Fisher's exact = 0.717  
 1-sided Fisher's exact = 0.477



. stddiff Anymat, by(Laboratoryconfirm)

|              | LaboratoryconfirmedCon~0 | LaboratoryconfirmedCon~1 |           |           |          |
|--------------|--------------------------|--------------------------|-----------|-----------|----------|
|              | Mean or N                | SD or (%)                | Mean or N | SD or (%) | Std Diff |
| Anymaterna~s | .1351                    | .34342                   | .1667     | .38348    | -0.08662 |

. tab Diabetes if Laboratoryconfirm==1, freq

| Diabetes  <br>(previous  <br>or  <br>gestational  <br>) | Freq. | Percent | Cum.   |
|---------------------------------------------------------|-------|---------|--------|
| 0                                                       | 17    | 94.44   | 94.44  |
| 1                                                       | 1     | 5.56    | 100.00 |
| Total                                                   | 18    | 100.00  |        |

. tab Diabetes if Laboratoryconfirm==0, freq

| Diabetes  <br>(previous  <br>or  <br>gestational  <br>) | Freq. | Percent | Cum.   |
|---------------------------------------------------------|-------|---------|--------|
| 0                                                       | 104   | 93.69   | 93.69  |
| 1                                                       | 7     | 6.31    | 100.00 |
| Total                                                   | 111   | 100.00  |        |

. tab Diabetes Laboratoryconfirm, exact

| Diabetes  <br>(previous  <br>or  <br>gestational  <br>) | Laboratory confirmed<br>Congenital ZIKA<br>infection | Total    |
|---------------------------------------------------------|------------------------------------------------------|----------|
| 0                                                       | 1                                                    |          |
| 0                                                       | 104                                                  | 17   121 |
| 1                                                       | 7                                                    | 1   8    |
| Total                                                   | 111                                                  | 18   129 |

Fisher's exact = 1.000  
1-sided Fisher's exact = 0.691

. stddiff Diabetes, by(Laboratoryconfirm)

|  | LaboratoryconfirmedCon~0 | LaboratoryconfirmedCon~1 |           |           |          |
|--|--------------------------|--------------------------|-----------|-----------|----------|
|  | Mean or N                | SD or (%)                | Mean or N | SD or (%) | Std Diff |

```
-----+-----+-----+-----+
Diabetespr~a | .06306   .24418 | .05556   .2357 | 0.03128
-----+-----+-----+-----+
```

```
. tab Vascular if Laboratoryconfirm==1, freq
```

| Vascular pathologies | Freq. | Percent | Cum.   |
|----------------------|-------|---------|--------|
| 0                    | 17    | 94.44   | 94.44  |
| 1                    | 1     | 5.56    | 100.00 |
| Total                | 18    | 100.00  |        |

```
. tab Vascular if Laboratoryconfirm==0, freq
```

| Vascular pathologies | Freq. | Percent | Cum.   |
|----------------------|-------|---------|--------|
| 0                    | 106   | 95.50   | 95.50  |
| 1                    | 5     | 4.50    | 100.00 |
| Total                | 111   | 100.00  |        |

```
. tab Vascular Laboratoryconfirm, exact
```

| Vascular pathologies | Laboratory confirmed Congenital ZIKA infection |    | Total |
|----------------------|------------------------------------------------|----|-------|
|                      | 0                                              | 1  |       |
| 0                    | 106                                            | 17 | 123   |
| 1                    | 5                                              | 1  | 6     |
| Total                | 111                                            | 18 | 129   |

```
Fisher's exact = 1.000
1-sided Fisher's exact = 0.602
```

```
. stddiff Vascular, by(Laboratoryconfirm)
```

|              | LaboratoryconfirmedCon~0 | LaboratoryconfirmedCon~1 |          |
|--------------|--------------------------|--------------------------|----------|
|              | Mean or N                | SD or (%)                | Std Diff |
| Vascularpa~s | .04505                   | .20834                   | -.04725  |

```
. tab Severe anemia if Laboratoryconfirm==1, freq
```

| Severe anemia | Freq. | Percent | Cum.   |
|---------------|-------|---------|--------|
| 0             | 17    | 94.44   | 94.44  |
| 1             | 1     | 5.56    | 100.00 |

```
-----+-----
Total |      18   100.00
```

```
. tab Severeanemia if Laboratoryconfirm==0, freq
```

```
Severe |
anemia |   Freq.  Percent  Cum.
-----+-----
0 |    106   95.50   95.50
1 |     5    4.50  100.00
-----+-----
Total |    111  100.00
```

```
. tab Severeanemia Laboratoryconfirm, exact
```

```
      | Laboratory confirmed
      | Congenital ZIKA
Severe | infection
anemia |    0      1 | Total
-----+-----+-----
0 |    106    17 |   123
1 |     5     1 |     6
-----+-----+-----
Total |    111    18 |   129
```

```
Fisher's exact =          1.000
1-sided Fisher's exact =      0.602
```

```
. stddiff Severeanemia, by(Laboratoryconfirm)
```

```
-----+-----+-----+-----+-----
|LaboratoryconfirmedCon~0 |LaboratoryconfirmedCon~1 |
| Mean or N   SD or (%) | Mean or N   SD or (%) | Std Diff
-----+-----+-----+-----+-----
Severeanemia | .04505   .20834 | .05556   .2357 | -0.04725
-----+-----+-----+-----+-----
```

```
. tab Coinf if Laboratoryconfirm==1, freq
```

```
Co-infectio |
ns |   Freq.  Percent  Cum.
-----+-----
0 |    17   94.44   94.44
1 |     1   5.56  100.00
-----+-----
Total |    18  100.00
```

```
. tab Coinf if Laboratoryconfirm==0, freq
```

```
Co-infectio |
ns |   Freq.  Percent  Cum.
-----+-----
0 |   109   98.20   98.20
1 |     2   1.80  100.00
-----+-----
Total |   111  100.00
```

```
. tab Coinf Laboratoryconfirm, exact
```

|               |     | Laboratory confirmed<br>Congenital ZIKA<br>infection |  | Total |
|---------------|-----|------------------------------------------------------|--|-------|
| Co-infections | 0   | 1                                                    |  |       |
| 0             | 109 | 17                                                   |  | 126   |
| 1             | 2   | 1                                                    |  | 3     |
| Total         | 111 | 18                                                   |  | 129   |

```
Fisher's exact = 0.365
1-sided Fisher's exact = 0.365
```

```
. stddiff Coinf, by(Laboratoryconfirm)
```

|              | LaboratoryconfirmedCon~0 | SD or (%) | LaboratoryconfirmedCon~1 | SD or (%) | Std Diff |
|--------------|--------------------------|-----------|--------------------------|-----------|----------|
| Coinfections | .01802                   | .13362    | .05556                   | .2357     | -0.19593 |

```
. * Maternal ZIKV infection:
```

```
. tab SymptomaticM if Laboratoryconfirm==1, freq
```

| Symptomatic<br>Maternal<br>Zika<br>infection |    | Freq.  | Percent | Cum. |
|----------------------------------------------|----|--------|---------|------|
| 0                                            | 14 | 77.78  | 77.78   |      |
| 1                                            | 4  | 22.22  | 100.00  |      |
| Total                                        | 18 | 100.00 |         |      |

```
. tab SymptomaticM if Laboratoryconfirm==0, freq
```

| Symptomatic<br>Maternal<br>Zika<br>infection |     | Freq.  | Percent | Cum. |
|----------------------------------------------|-----|--------|---------|------|
| 0                                            | 89  | 80.18  | 80.18   |      |
| 1                                            | 22  | 19.82  | 100.00  |      |
| Total                                        | 111 | 100.00 |         |      |

```
. tab SymptomaticM Laboratoryconfirm, chi2
```

| Symptomatic<br>Maternal<br>Zika<br>infection |   | Laboratory confirmed<br>Congenital ZIKA<br>infection |  | Total |
|----------------------------------------------|---|------------------------------------------------------|--|-------|
|                                              | 0 | 1                                                    |  |       |
| 0                                            |   |                                                      |  |       |
| 1                                            |   |                                                      |  |       |

|                   |     |    |     |
|-------------------|-----|----|-----|
| 0                 | 89  | 14 | 103 |
| 1                 | 22  | 4  | 26  |
| -----+-----+----- |     |    |     |
| Total             | 111 | 18 | 129 |

Pearson chi2(1) = 0.0555 Pr = 0.814

. stddiff SymptomaticM, by(Laboratoryconfirm)

|                   | LaboratoryconfirmedCon~0 | LaboratoryconfirmedCon~1 |           |                      |
|-------------------|--------------------------|--------------------------|-----------|----------------------|
|                   | Mean or N                | SD or (%)                | Mean or N | SD or (%)   Std Diff |
| -----+-----+----- |                          |                          |           |                      |
| Symptomatic~t     | .1982                    | .40045                   | .2222     | .42779   -0.05798    |

. tab Trimester if Laboratoryconfirm==1, freq

| Trimester   |       |         |        |
|-------------|-------|---------|--------|
| of Maternal |       |         |        |
| Zika        |       |         |        |
| infection   | Freq. | Percent | Cum.   |
| -----+----- |       |         |        |
| .           | 2     | 11.11   | 11.11  |
| 1           | 7     | 38.89   | 50.00  |
| 2           | 7     | 38.89   | 88.89  |
| 3           | 2     | 11.11   | 100.00 |
| -----+----- |       |         |        |
| Total       | 18    | 100.00  |        |

. tab Trimester if Laboratoryconfirm==0, freq

| Trimester   |       |         |        |
|-------------|-------|---------|--------|
| of Maternal |       |         |        |
| Zika        |       |         |        |
| infection   | Freq. | Percent | Cum.   |
| -----+----- |       |         |        |
| .           | 22    | 19.82   | 19.82  |
| 1           | 27    | 24.32   | 44.14  |
| 2           | 37    | 33.33   | 77.48  |
| 3           | 25    | 22.52   | 100.00 |
| -----+----- |       |         |        |
| Total       | 111   | 100.00  |        |

. gen t1=0

. replace t1=1 if Trimester=="1"  
(34 real changes made)

. tab t1 Laboratoryconfirm, chi2

|             | Laboratory confirmed |   |       |
|-------------|----------------------|---|-------|
|             | Congenital ZIKA      |   |       |
|             | infection            |   |       |
| t1          | 0                    | 1 | Total |
| -----+----- |                      |   |       |

|       |     |    |     |
|-------|-----|----|-----|
| 0     | 84  | 11 | 95  |
| 1     | 27  | 7  | 34  |
| ----- |     |    |     |
| Total | 111 | 18 | 129 |

Pearson chi2(1) = 1.6927 Pr = 0.193

. stddiff t1, by(Laboratoryconfirm)

|    | LaboratoryconfirmedCon~0 | LaboratoryconfirmedCon~1 |           |                      |
|----|--------------------------|--------------------------|-----------|----------------------|
|    | Mean or N                | SD or (%)                | Mean or N | SD or (%)   Std Diff |
| t1 | .2432                    | .43099                   | .3889     | .50163   -0.31145    |

. gen t2=0

. replace t2=1 if Trimester=="2"  
(45 real changes made)

. tab t2 Laboratoryconfirm, chi2

|       | Laboratory confirmed<br>  Congenital ZIKA<br>  infection |    |       |
|-------|----------------------------------------------------------|----|-------|
| t2    | 0                                                        | 1  | Total |
| 0     | 74                                                       | 11 | 85    |
| 1     | 37                                                       | 7  | 44    |
| ----- |                                                          |    |       |
| Total | 111                                                      | 18 | 129   |

Pearson chi2(1) = 0.2127 Pr = 0.645

. stddiff t2, by(Laboratoryconfirm)

|    | LaboratoryconfirmedCon~0 | LaboratoryconfirmedCon~1 |           |                      |
|----|--------------------------|--------------------------|-----------|----------------------|
|    | Mean or N                | SD or (%)                | Mean or N | SD or (%)   Std Diff |
| t2 | .3333                    | .47354                   | .3889     | .50163   -0.11389    |

. gen t3=0

. replace t3=1 if Trimester=="3"  
(29 real changes made)

. tab t3 Laboratoryconfirm, exact

|    | Laboratory confirmed<br>  Congenital ZIKA<br>  infection |    |       |
|----|----------------------------------------------------------|----|-------|
| t3 | 0                                                        | 1  | Total |
| 0  | 86                                                       | 16 | 102   |

|                   |     |    |     |
|-------------------|-----|----|-----|
| 1                 | 25  | 2  | 27  |
| -----+-----+----- |     |    |     |
| Total             | 111 | 18 | 129 |

Fisher's exact = 0.360  
 1-sided Fisher's exact = 0.220

. stddiff t3, by(Laboratoryconfirm)

|                   | LaboratoryconfirmedCon~0 | LaboratoryconfirmedCon~1 |                                |
|-------------------|--------------------------|--------------------------|--------------------------------|
|                   | Mean or N                | SD or (%)                | Mean or N SD or (%)   Std Diff |
| -----+-----+----- |                          |                          |                                |
| t3                | .2252                    | .41963                   | .1111 .32338   0.30462         |

. gen t\_unk=0

. replace t\_unk=1 if Trimester=="."  
 (24 real changes made)

. tab t\_unk Laboratoryconfirm, exact

|                   | Laboratory confirmed<br>  Congenital ZIKA<br>  infection |    |       |
|-------------------|----------------------------------------------------------|----|-------|
| t_unk             | 0                                                        | 1  | Total |
| -----+-----+----- |                                                          |    |       |
| 0                 | 89                                                       | 16 | 105   |
| 1                 | 22                                                       | 2  | 24    |
| -----+-----+----- |                                                          |    |       |
| Total             | 111                                                      | 18 | 129   |

Fisher's exact = 0.523  
 1-sided Fisher's exact = 0.304

. stddiff t\_unk, by(Laboratoryconfirm)

|                   | LaboratoryconfirmedCon~0 | LaboratoryconfirmedCon~1 |                                |
|-------------------|--------------------------|--------------------------|--------------------------------|
|                   | Mean or N                | SD or (%)                | Mean or N SD or (%)   Std Diff |
| -----+-----+----- |                          |                          |                                |
| t_unk             | .1982                    | .40045                   | .1111 .32338   0.23928         |

. \* Dichorionic twins

. tab Dichorionictwins if Laboratoryconfirm==1, freq

| Dichorionic | twins | Freq.  | Percent | Cum. |
|-------------|-------|--------|---------|------|
| -----+----- |       |        |         |      |
| 0           | 16    | 88.89  | 88.89   |      |
| 1           | 2     | 11.11  | 100.00  |      |
| -----+----- |       |        |         |      |
| Total       | 18    | 100.00 |         |      |

. tab Dichorionictwins if Laboratoryconfirm==0, freq

| Dichorionic twins | Freq. | Percent | Cum.   |
|-------------------|-------|---------|--------|
| 0                 | 105   | 94.59   | 94.59  |
| 1                 | 6     | 5.41    | 100.00 |
| Total             | 111   | 100.00  |        |

. tab Dichorionictwins Laboratoryconfirm, exact

| Dichorionic twins | Laboratory confirmed infection |    | Total |
|-------------------|--------------------------------|----|-------|
|                   | 0                              | 1  |       |
| 0                 | 105                            | 16 | 121   |
| 1                 | 6                              | 2  | 8     |
| Total             | 111                            | 18 | 129   |

Fisher's exact = 0.309  
1-sided Fisher's exact = 0.309

. stddiff Dichorionictwins, by(Laboratoryconfirm)

| Dichorionictwins | LaboratoryconfirmedCon~0 | LaboratoryconfirmedCon~1 | Std Diff  |
|------------------|--------------------------|--------------------------|-----------|
|                  | Mean or N                | SD or (%)                | Mean or N |
| Dichorionictwins | .05405                   | .22715                   | .1111     |
|                  |                          |                          | .32338    |
|                  |                          |                          | -0.20418  |

\* Gender

. tab Fetusgender if Laboratoryconfirm==1, freq

| Fetus gender | Freq. | Percent | Cum.   |
|--------------|-------|---------|--------|
| F            | 10    | 55.56   | 55.56  |
| M            | 8     | 44.44   | 100.00 |
| Total        | 18    | 100.00  |        |

. tab Fetusgender if Laboratoryconfirm==0, freq

| Fetus gender | Freq. | Percent | Cum.   |
|--------------|-------|---------|--------|
| F            | 63    | 56.76   | 56.76  |
| M            | 48    | 43.24   | 100.00 |
| Total        | 111   | 100.00  |        |

. gen male=0



. replace male=1 if Fetusgender=="M"  
 (58 real changes made)

. tab male Laboratoryconfirm, chi2

|       | Laboratory confirmed<br>Congenital ZIKA<br>infection |    | Total |
|-------|------------------------------------------------------|----|-------|
| male  | 0                                                    | 1  |       |
| 0     | 63                                                   | 10 | 73    |
| 1     | 48                                                   | 8  | 56    |
| Total | 111                                                  | 18 | 129   |

Pearson chi2(1) = 0.0091 Pr = 0.924

. stddiff male, by(Laboratoryconfirm)

|      | LaboratoryconfirmedCon~0 |           | LaboratoryconfirmedCon~1 |           | Std Diff |
|------|--------------------------|-----------|--------------------------|-----------|----------|
|      | Mean or N                | SD or (%) | Mean or N                | SD or (%) |          |
| male | .4324                    | .49766    | .4444                    | .51131    | -0.02381 |

. \* Birth  
 . sum Term if Laboratoryconfirm==1, d

Term at birth (weeksâ€™ gestation)

| Percentiles | Smallest |    |                    |
|-------------|----------|----|--------------------|
| 1%          | 32       | 32 |                    |
| 5%          | 32       | 37 |                    |
| 10%         | 37       | 37 | Obs 18             |
| 25%         | 38       | 37 | Sum of Wgt. 18     |
| 50%         | 39       |    | Mean 38.44444      |
|             | Largest  |    | Std. Dev. 1.94701  |
| 75%         | 39       | 40 |                    |
| 90%         | 40       | 40 | Variance 3.79085   |
| 95%         | 41       | 40 | Skewness -2.029757 |
| 99%         | 41       | 41 | Kurtosis 7.79679   |

. sum Term if Laboratoryconfirm==0, d

Term at birth (weeksâ€™ gestation)

| Percentiles | Smallest |    |                    |
|-------------|----------|----|--------------------|
| 1%          | 36       | 36 |                    |
| 5%          | 36       | 36 |                    |
| 10%         | 37       | 36 | Obs 111            |
| 25%         | 38       | 36 | Sum of Wgt. 111    |
| 50%         | 39       |    | Mean 38.73874      |
|             | Largest  |    | Std. Dev. 1.298333 |

```

75%      40      41
90%      40      41   Variance   1.685667
95%      41      41   Skewness  -.2073347
99%      41      41   Kurtosis  2.455612

```

```
. ranksum Term, by(Laboratoryconfirm)
```

Two-sample Wilcoxon rank-sum (Mann-Whitney) test

```

Laboratory~1 |   obs   rank sum   expected
-----+-----
      0 |   111    7239    7215
      1 |    18    1146    1170
-----+-----
combined |   129    8385    8385

```

```

unadjusted variance  21645.00
adjustment for ties  -1142.03
-----
adjusted variance    20502.97

```

```

Ho: Termat~n(Labora~l==0) = Termat~n(Labora~l==1)
      z = 0.168
      Prob > |z| = 0.8669
      Exact Prob = 0.8661

```

```
. stddiff Term, by(Laboratoryconfirm)
```

```

-----+-----+-----+-----+-----+
| LaboratoryconfirmedCon~0 | LaboratoryconfirmedCon~1 |
| Mean or N   SD or (%) | Mean or N   SD or (%) | Std Diff
-----+-----+-----+-----+-----+
Termatbirt~n | 38.74   1.2983 | 38.44   1.947 | 0.17785
-----+-----+-----+-----+

```

```
. gen prema=0
```

```
. replace prema=1 if Term<37
(7 real changes made)
```

```
. tab prema Laboratoryconfirm, exact
```

```

| Laboratory confirmed
| Congenital ZIKA
| infection
prema |    0    1 | Total
-----+-----+-----
      0 |   105   17 |   122
      1 |    6    1 |    7
-----+-----+-----
Total |   111   18 |   129

```

```

Fisher's exact =          1.000
1-sided Fisher's exact =      0.660

```

```
. stddiff prema,by(Laboratoryconfirm)
```

|       | LaboratoryconfirmedCon~0 | LaboratoryconfirmedCon~1 |           |           |          |
|-------|--------------------------|--------------------------|-----------|-----------|----------|
|       | Mean or N                | SD or (%)                | Mean or N | SD or (%) | Std Diff |
| prema | .05405                   | .22715                   | .05556    | .2357     | -0.00649 |

. tab Mode if Laboratoryconfirm==1, freq

| Mode of delivery | Freq. | Percent | Cum.   |
|------------------|-------|---------|--------|
| CS               | 5     | 27.78   | 27.78  |
| N                | 13    | 72.22   | 100.00 |
| Total            | 18    | 100.00  |        |

. tab Mode if Laboratoryconfirm==0, freq

| Mode of delivery | Freq. | Percent | Cum.   |
|------------------|-------|---------|--------|
| CS               | 14    | 12.61   | 12.61  |
| N                | 97    | 87.39   | 100.00 |
| Total            | 111   | 100.00  |        |

. gen cs=0

. replace cs=1 if Mode=="CS"  
(19 real changes made)

. tab cs Laboratoryconfirm, chi2

|       | Laboratory confirmed Congenital ZIKA infection |    | Total |
|-------|------------------------------------------------|----|-------|
| cs    | 0                                              | 1  |       |
| 0     | 97                                             | 13 | 110   |
| 1     | 14                                             | 5  | 19    |
| Total | 111                                            | 18 | 129   |

Pearson chi2(1) = 2.8362 Pr = 0.092

. stddiff cs, by(Laboratoryconfirm)

|    | LaboratoryconfirmedCon~0 | LaboratoryconfirmedCon~1 |           |           |          |
|----|--------------------------|--------------------------|-----------|-----------|----------|
|    | Mean or N                | SD or (%)                | Mean or N | SD or (%) | Std Diff |
| cs | .1261                    | .3335                    | .2778     | .46089    | -0.37699 |

```
. gen apgar6=0
```

```
. replace apgar6=1 if Apgar<6  
(15 real changes made)
```

```
. tab apgar6 if Laboratoryconfirm==1, freq
```

| apgar6 | Freq. | Percent | Cum.   |
|--------|-------|---------|--------|
| 0      | 16    | 88.89   | 88.89  |
| 1      | 2     | 11.11   | 100.00 |
| Total  | 18    | 100.00  |        |

```
. tab apgar6 if Laboratoryconfirm==0, freq
```

| apgar6 | Freq. | Percent | Cum.   |
|--------|-------|---------|--------|
| 0      | 98    | 88.29   | 88.29  |
| 1      | 13    | 11.71   | 100.00 |
| Total  | 111   | 100.00  |        |

```
. tab apgar6 Laboratoryconfirm, exact
```

|        | Laboratory confirmed<br>  Congenital ZIKA<br>  infection |    |       |
|--------|----------------------------------------------------------|----|-------|
| apgar6 | 0                                                        | 1  | Total |
| 0      | 98                                                       | 16 | 114   |
| 1      | 13                                                       | 2  | 15    |
| Total  | 111                                                      | 18 | 129   |

```
Fisher's exact = 1.000  
1-sided Fisher's exact = 0.651
```

```
. stddiff apgar6, by(Laboratoryconfirm)
```

|        | LaboratoryconfirmedCon~0  LaboratoryconfirmedCon~1 |           |                                |
|--------|----------------------------------------------------|-----------|--------------------------------|
|        | Mean or N                                          | SD or (%) | Mean or N SD or (%)   Std Diff |
| apgar6 | .1171                                              | .32302    | .1111 .32338   0.01858         |

```
. tab Lactate if Laboratoryconfirm==1, freq
```

| Lactates>4. | Freq. | Percent | Cum.   |
|-------------|-------|---------|--------|
| 0           | 16    | 88.89   | 88.89  |
| 1           | 2     | 11.11   | 100.00 |
| Total       | 18    | 100.00  |        |

```
. tab Lactate if Laboratoryconfirm==0, freq
```

```
Lactates>4. |
```

| 5     | Freq. | Percent | Cum.   |
|-------|-------|---------|--------|
| 0     | 95    | 85.59   | 85.59  |
| 1     | 16    | 14.41   | 100.00 |
| ----- |       |         |        |
| Total | 111   | 100.00  |        |

```
. tab Lactate Laboratoryconfirm, exact
```

```
      | Laboratory confirmed  
      | Congenital ZIKA  
Lactates>4 | infection
```

| .5    | 0   | 1  | Total |
|-------|-----|----|-------|
| 0     | 95  | 16 | 111   |
| 1     | 16  | 2  | 18    |
| ----- |     |    |       |
| Total | 111 | 18 | 129   |

```
Fisher's exact = 1.000  
1-sided Fisher's exact = 0.523
```

```
. stddiff Lactate, by(Laboratoryconfirm)
```

```
-----  
|LaboratoryconfirmedCon~0 |LaboratoryconfirmedCon~1 |  
| Mean or N   SD or (%) | Mean or N   SD or (%) | Std Diff  
-----+-----+-----  
Lactates45 | .1441   .35283 | .1111   .32338 | 0.09761  
-----
```

```
. log close
```

```
name: <unnamed>
```

```
log: \\HOME\lpomar\Mes Documents\Zika_enfants-Guyane\Nature\R1\Dataset\Table1.log
```

```
log type: text
```

```
closed on: 23 Mar 2021, 11:49:30  
-----  
-----
```

```

-----
name: <unnamed>
log: \\HOME\lpomar\Mes Documents\Zika_enfants-Guyane\Nature\R1\Dataset\Table2.log
log type: text
opened on: 23 Mar 2021, 15:02:33

. import excel "\\HOME\lpomar\Mes Documents\Zika_enfants-Guyane\Nature\R1\Dataset\Source Data.xlsx",
sheet("Table 2") firstrow
(26 vars, 132 obs)

.
. destring CongZIKA, replace
CongZIKA: all characters numeric; replaced as byte
(3 missing values generated)

. destring Adverseoutcomesupto2y, replace
Adverseoutcomesupto2y: all characters numeric; replaced as byte
(21 missing values generated)

. destring Neurologicimpairments, replace
Neurologicimpairments: all characters numeric; replaced as byte
(21 missing values generated)

. destring Delayinmotoracquisitions, replace
Delayinmotoracquisitions: all characters numeric; replaced as byte
(21 missing values generated)

. destring Neurosensoryalterations, replace
Neurosensoryalterations: all characters numeric; replaced as byte
(21 missing values generated)

. destring Neurodevelopment2SDat3y, replace
Neurodevelopment2SDat3y: all characters numeric; replaced as byte
(70 missing values generated)

. destring Motordomain2SD, replace
Motordomain2SD: all characters numeric; replaced as byte
(70 missing values generated)

. destring Congitivedomain2SD, replace
Congitivedomain2SD: all characters numeric; replaced as byte
(70 missing values generated)

. destring Socioaffectivedomain2SD, replace
Socioaffectivedomain2SD: all characters numeric; replaced as byte
(70 missing values generated)

. destring Lowsocioeconomicstatus, replace
Lowsocioeconomicstatus: all characters numeric; replaced as byte
(22 missing values generated)

.
. ** Adverse outcomes at 2months of life:
. tab Adverseoutcomesupto2m if CongZIKA==1, freq

Adverse |

```

| outcomes up  <br>to 2m | Freq. | Percent | Cum.   |
|------------------------|-------|---------|--------|
| 0                      | 10    | 55.56   | 55.56  |
| 1                      | 8     | 44.44   | 100.00 |
| Total                  | 18    | 100.00  |        |

. tab Adverseoutcomesupto2m if CongZIKA==0, freq

| Adverse  <br>outcomes up  <br>to 2m | Freq. | Percent | Cum.   |
|-------------------------------------|-------|---------|--------|
| 0                                   | 107   | 96.40   | 96.40  |
| 1                                   | 4     | 3.60    | 100.00 |
| Total                               | 111   | 100.00  |        |

. \* Crude Analysis  
. glm Adverseoutcomesupto2m CongZIKA, fam(bin) link(log) nolog eform

Generalized linear models                      Number of obs =     129  
Optimization    : ML                            Residual df       =    127  
                                                  Scale parameter =     1  
Deviance        = 59.17059599                    (1/df) Deviance = .4659102  
Pearson         =        129                      (1/df) Pearson = 1.015748

Variance function: V(u) = u\*(1-u)            [Bernoulli]  
Link function    : g(u) = ln(u)                [Log]

                                                  AIC                = .4896945  
Log likelihood = -29.58529799                    BIC                = -558.0256

|          | OIM      | Risk Ratio | Std. Err. | z     | P> z     | [95% Conf. Interval] |
|----------|----------|------------|-----------|-------|----------|----------------------|
| CongZIKA | 12.33333 | 6.87173    | 4.51      | 0.000 | 4.13827  | 36.75718             |
| _cons    | .036036  | .0176904   | -6.77     | 0.000 | .0137681 | .0943189             |

Note: \_cons estimates baseline risk.

. est store CRUDE

. \* Adjusted on maternal infection in the 1st trimester  
. glm Adverseoutcomesupto2m CongZIKA Maternalinfectioninthe1sttr, fam(bin) link(log) nolog eform

Generalized linear models                      Number of obs =     129  
Optimization    : ML                            Residual df       =    126  
                                                  Scale parameter =     1  
Deviance        = 49.46063976                    (1/df) Deviance = .3925448  
Pearson         = 139.3390301                    (1/df) Pearson = 1.105865

Variance function: V(u) = u\*(1-u)            [Bernoulli]

Link function :  $g(u) = \ln(u)$  [Log]

AIC = .4299274  
Log likelihood = -24.73031988 BIC = -562.8757

---

|                             | OIM        |           |       |       |                      |          |
|-----------------------------|------------|-----------|-------|-------|----------------------|----------|
| Adverseoutcomesupto2m       | Risk Ratio | Std. Err. | z     | P> z  | [95% Conf. Interval] |          |
| CongZIKA                    | 10.07381   | 5.427441  | 4.29  | 0.000 | 3.50424              | 28.95966 |
| Maternalinfectioninthe1sttr | 4.170967   | 2.163393  | 2.75  | 0.006 | 1.509164             | 11.52755 |
| _cons                       | .0202444   | .0116293  | -6.79 | 0.000 | .0065666             | .0624127 |

---

Note: \_cons estimates baseline risk.

. est store A

. lrtest CRUDE /\* p=0.0018 => Difference between crude and adjusted RR \*/

Likelihood-ratio test LR chi2(1) = 9.71  
(Assumption: CRUDE nested in A) Prob > chi2 = 0.0018

. \* Effect modifiers?

. glm Adverseoutcomesupto2m CongZIKA Maternalinfectioninthe1sttr Maternalage, fam(bin) link(log) nolog eform  
convergence not achieved

Generalized linear models Number of obs = 129  
Optimization : ML Residual df = 125  
Scale parameter = 1  
Deviance = 49.3541955 (1/df) Deviance = .3948336  
Pearson = 125.3919825 (1/df) Pearson = 1.003136

Variance function:  $V(u) = u*(1-u)$  [Bernoulli]  
Link function :  $g(u) = \ln(u)$  [Log]

AIC = .4446062  
Log likelihood = -24.67709775 BIC = -558.1224

---

|                             | OIM        |           |       |       |                      |          |
|-----------------------------|------------|-----------|-------|-------|----------------------|----------|
| Adverseoutcomesupto2m       | Risk Ratio | Std. Err. | z     | P> z  | [95% Conf. Interval] |          |
| CongZIKA                    | 9.294551   | 4.916121  | 4.22  | 0.000 | 3.296147             | 26.20899 |
| Maternalinfectioninthe1sttr | 4.250735   | 2.243583  | 2.74  | 0.006 | 1.510744             | 11.96017 |
| Maternalageatbirthyears     | .9689544   | .0610639  | -0.50 | 0.617 | .8563677             | 1.096343 |
| _cons                       | .0481705   | .0792893  | -1.84 | 0.065 | .0019129             | 1.213028 |

---

Note: \_cons estimates baseline risk.

Warning: parameter estimates produce inadmissible mean estimates in one or more observations.

Warning: convergence not achieved

. lrtest A

Likelihood-ratio test LR chi2(1) = 0.11  
(Assumption: A nested in .) Prob > chi2 = 0.7442



. glm Adverseoutcomesupto2m CongZIKA Maternalinfectioninthe1sttr Low, fam(bin) link(log) nolog eform  
convergence not achieved

Generalized linear models                    Number of obs =     107  
Optimization    : ML                        Residual df    =    103  
                                              Scale parameter =     1  
Deviance        = 44.29026976                (1/df) Deviance = .4300026  
Pearson         = 198.6377814                (1/df) Pearson = 1.928522  
Variance function: V(u) = u\*(1-u)            [Bernoulli]  
Link function    : g(u) = ln(u)                [Log]  
                                              AIC                = .4886941  
Log likelihood = -22.14513488                BIC                = -437.0111

---

|                             | OIM        |           |       |       |                      |          |
|-----------------------------|------------|-----------|-------|-------|----------------------|----------|
| Adverseoutcomesupto2m       | Risk Ratio | Std. Err. | z     | P> z  | [95% Conf. Interval] |          |
| CongZIKA                    | 12.04362   | 7.95825   | 3.77  | 0.000 | 3.29834              | 43.9763  |
| Maternalinfectioninthe1sttr | 5.840566   | 4.057034  | 2.54  | 0.011 | 1.496872             | 22.789   |
| Lowsocioeconomicstatus      | 1.553995   | 1.280183  | 0.54  | 0.593 | .3091925             | 7.810347 |
| _cons                       | .0121336   | .011509   | -4.65 | 0.000 | .0018906             | .0778704 |

---

Note: \_cons estimates baseline risk.  
Warning: parameter estimates produce inadmissible mean estimates in one or more observations.  
Warning: convergence not achieved

. lrtest A  
observations differ: 107 vs. 129  
r(498);  
end of do-file  
r(498);  
.do "C:\Users\lpomar\AppData\Local\Temp\STD3ed0\_000000.tmp"  
. glm Adverseoutcomesupto2m CongZIKA Maternalinfectioninthe1sttr Alcohol, fam(bin) link(log) nolog eform

Generalized linear models                    Number of obs =     129  
Optimization    : ML                        Residual df    =    125  
                                              Scale parameter =     1  
Deviance        = 49.34920795                (1/df) Deviance = .3947937  
Pearson         = 143.6365806                (1/df) Pearson = 1.149093  
Variance function: V(u) = u\*(1-u)            [Bernoulli]  
Link function    : g(u) = ln(u)                [Log]  
                                              AIC                = .4445675  
Log likelihood = -24.67460398                BIC                = -558.1273

---

|                       | OIM        |           |   |      |                      |  |
|-----------------------|------------|-----------|---|------|----------------------|--|
| Adverseoutcomesupto2m | Risk Ratio | Std. Err. | z | P> z | [95% Conf. Interval] |  |

---

```

CongZIKA | 10.398 5.671159 4.29 0.000 3.57024 30.28325
Maternalinfectioninthe1sttr | 4.311947 2.276365 2.77 0.006 1.532169 12.13501
Alcohol | 1.415908 1.389202 0.35 0.723 .2069612 9.686825
_cons | .0189497 .0117243 -6.41 0.000 .0056358 .0637156

```

-----  
Note: \_cons estimates baseline risk.

. lrtest A

```

Likelihood-ratio test          LR chi2(1) =    0.11
(Assumption: A nested in .)    Prob > chi2 =   0.7385

```

. end of do-file

. do "C:\Users\lpomar\AppData\Local\Temp\STD3ed0\_000000.tmp"

. glm Adverseoutcomesupto2m CongZIKA Maternalinfectioninthe1sttr Smoking, fam(bin) link(log) nolog eform

```

Generalized linear models      Number of obs =   128
Optimization   : ML           Residual df   =   124
                               Scale parameter =    1
Deviance       = 48.12350859    (1/df) Deviance = .3880928
Pearson        = 161.0006352    (1/df) Pearson  = 1.298392

```

```

Variance function: V(u) = u*(1-u)    [Bernoulli]
Link function   : g(u) = ln(u)        [Log]

```

```

                               AIC      = .4384649
Log likelihood = -24.06175429          BIC      = -553.5282

```

```

-----+-----
|           OIM
Adverseoutcomesupto2m | Risk Ratio  Std. Err.   z  P>|z|  [95% Conf. Interval]
-----+-----
CongZIKA | 12.59692  7.730123  4.13  0.000  3.783756  41.93781
Maternalinfectioninthe1sttr | 3.982913  2.037706  2.70  0.007  1.461221  10.8564
Smoking | 4.146219  4.336732  1.36  0.174  .5337515  32.20812
_cons | .016896  .0107137 -6.44  0.000  .0048757  .0585501

```

-----  
Note: \_cons estimates baseline risk.

. lrtest A  
observations differ: 128 vs. 129  
r(498);

. end of do-file

r(498);

. do "C:\Users\lpomar\AppData\Local\Temp\STD3ed0\_000000.tmp"

```

. glm Adverseoutcomesupto2m CongZIKA Maternalinfectioninthe1sttr Leadp, fam(bin) link(log) nolog eform
note: Leadpoisoning != 0 predicts failure perfectly
Leadpoisoning dropped and 7 obs not used

```

Generalized linear models                      Number of obs =     122  
 Optimization    : ML                            Residual df    =     126  
                                                  Scale parameter =     1  
 Deviance        = 49.49622339                    (1/df) Deviance = .3928272  
 Pearson         = 131.2625822                    (1/df) Pearson = 1.041767

Variance function: V(u) = u\*(1-u)            [Bernoulli]  
 Link function    : g(u) = ln(u)                [Log]

                                                 AIC            = .42423  
 Log likelihood = -24.36283646                BIC            = -562.8401

```
-----+-----
```

|                             | OIM         |           |       |       |                      |          |
|-----------------------------|-------------|-----------|-------|-------|----------------------|----------|
| Adverseoutcomesupto2m       | Risk Ratio  | Std. Err. | z     | P> z  | [95% Conf. Interval] |          |
| CongZIKA                    | 10.13224    | 5.458601  | 4.30  | 0.000 | 3.524788             | 29.12583 |
| Maternalinfectioninthe1sttr | 3.820946    | 1.968834  | 2.60  | 0.009 | 1.391775             | 10.48994 |
| Leadpoisoning               | 1 (omitted) |           |       |       |                      |          |
| _cons                       | .0219793    | .0125777  | -6.67 | 0.000 | .00716               | .0674706 |

```
-----+-----
```

Note: \_cons estimates baseline risk.

```
. lrtest A
df(unrestricted) = df(restricted) = 3
r(498);

end of do-file

r(498);

.do "C:\Users\lpomar\AppData\Local\Temp\STD3ed0_000000.tmp"

.glm Adverseoutcomesupto2m CongZIKA Maternalinfectioninthe1sttr Anymaternalco, fam(bin) link(log) nolog
eform
note: Anymaternalcomorbidities != 0 predicts failure perfectly
Anymaternalcomorbidities dropped and 18 obs not used
```

Generalized linear models                      Number of obs =     111  
 Optimization    : ML                            Residual df    =     126  
                                                  Scale parameter =     1  
 Deviance        = 49.77844925                    (1/df) Deviance = .3950671  
 Pearson         = 114.0857765                    (1/df) Pearson = .9054427

Variance function: V(u) = u\*(1-u)            [Bernoulli]  
 Link function    : g(u) = ln(u)                [Log]

                                                 AIC            = .4082759  
 Log likelihood = -23.3337971                BIC            = -562.5579

```
-----+-----
```

|                             | OIM        |           |      |       |                      |          |
|-----------------------------|------------|-----------|------|-------|----------------------|----------|
| Adverseoutcomesupto2m       | Risk Ratio | Std. Err. | z    | P> z  | [95% Conf. Interval] |          |
| CongZIKA                    | 9.591073   | 5.279054  | 4.11 | 0.000 | 3.261029             | 28.20849 |
| Maternalinfectioninthe1sttr | 3.351702   | 1.754452  | 2.31 | 0.021 | 1.201443             | 9.350347 |

```
-----+-----
```

```

Anymaternalcomorbidities |      1 (omitted)
      _cons | .0266267   .01488  -6.49  0.000   .008905  .0796159

```

Note: \_cons estimates baseline risk.

```

. lrtest A
df(unrestricted) = df(restricted) = 3
r(498);

```

end of do-file

```
r(498);
```

```
. do "C:\Users\lpomar\AppData\Local\Temp\STD3ed0_000000.tmp"
```

```
. glm Adverseoutcomesupto2m CongZIKA Maternalinfectioninthe1sttr Infantgender, fam(bin) link(log) nolog eform
convergence not achieved
```

```

Generalized linear models          Number of obs =    129
Optimization   : ML                Residual df   =    125
                                Scale parameter =     1
Deviance       = 50.13978181        (1/df) Deviance = .4011183
Pearson        = 213.6708675        (1/df) Pearson  = 1.709367

```

```

Variance function: V(u) = u*(1-u)    [Bernoulli]
Link function   : g(u) = ln(u)       [Log]

```

```

                                AIC      = .450696
Log likelihood = -25.06989091          BIC      = -557.3368

```

```

-----+-----
                |      OIM
Adverseoutcomesupto2m | Risk Ratio  Std. Err.   z  P>|z|  [95% Conf. Interval]
-----+-----
CongZIKA | 16.11583  11.18632   4.00  0.000   4.134438  62.81866
Maternalinfectioninthe1sttr | 5.927055  4.261905   2.47  0.013   1.448019  24.26071
Infantgender | 1.79128  1.395039   0.75  0.454   .3892715  8.242795
      _cons | .0090272  .0100989  -4.21  0.000   .0010076  .0808742

```

Note: \_cons estimates baseline risk.

Warning: parameter estimates produce inadmissible mean estimates in one or more observations.

Warning: convergence not achieved

```
. lrtest A
```

```

Likelihood-ratio test          LR chi2(1) =  -0.68
(Assumption: A nested in .)    Prob > chi2 =  1.0000

```

end of do-file

```
. do "C:\Users\lpomar\AppData\Local\Temp\STD3ed0_000000.tmp"
```

```
. glm Adverseoutcomesupto2m CongZIKA Maternalinfectioninthe1sttr Twins, fam(bin) link(log) nolog eform
note: Twins != 0 predicts failure perfectly
Twins dropped and 8 obs not used
```

Generalized linear models                      Number of obs =     121  
 Optimization    : ML                          Residual df    =     126  
                                                  Scale parameter =     1  
 Deviance        = 49.57789331                (1/df) Deviance = .3934753  
 Pearson         = 127.8620699                (1/df) Pearson = 1.014778

Variance function: V(u) = u\*(1-u)            [Bernoulli]  
 Link function    : g(u) = ln(u)                [Log]

                                                 AIC            = .4201519  
 Log likelihood = -24.09979754                BIC            = -562.7585

```
-----+-----
```

|                            | OIM         |           |       |       |          | [95% Conf. Interval] |  |
|----------------------------|-------------|-----------|-------|-------|----------|----------------------|--|
| Adverseoutcomesupto2m      | Risk Ratio  | Std. Err. | z     | P> z  |          |                      |  |
| CongZIKA                   | 10.47541    | 5.685295  | 4.33  | 0.000 | 3.615764 | 30.34881             |  |
| Maternalinfectioninthe1str | 3.546996    | 1.830741  | 2.45  | 0.014 | 1.289801 | 9.754357             |  |
| Twins                      | 1 (omitted) |           |       |       |          |                      |  |
| _cons                      | .0229467    | .0130249  | -6.65 | 0.000 | .0075434 | .0698033             |  |

```
-----+-----
```

Note: \_cons estimates baseline risk.

```
. lrtest A
df(unrestricted) = df(restricted) = 3
r(498);

end of do-file

r(498);

.do "C:\Users\lpomar\AppData\Local\Temp\STD3ed0_000000.tmp"

.glm Adverseoutcomesupto2m CongZIKA Maternalinfectioninthe1str Modeofdelivery, fam(bin) link(log) nolog
eform
convergence not achieved
```

Generalized linear models                      Number of obs =     129  
 Optimization    : ML                          Residual df    =     127  
                                                  Scale parameter =     1  
 Deviance        = 104.6869905                (1/df) Deviance = .824307  
 Pearson         = 100000049.2                (1/df) Pearson = 787402

Variance function: V(u) = u\*(1-u)            [Bernoulli]  
 Link function    : g(u) = ln(u)                [Log]

                                                 AIC            = .8425348  
 Log likelihood = -52.34349525                BIC            = -512.5092

```
-----+-----
```

|                            | OIM        |           |       |       |          | [95% Conf. Interval] |  |
|----------------------------|------------|-----------|-------|-------|----------|----------------------|--|
| Adverseoutcomesupto2m      | Risk Ratio | Std. Err. | z     | P> z  |          |                      |  |
| CongZIKA                   | 3.810155   | .         | .     | .     | .        | .                    |  |
| Maternalinfectioninthe1str | 2.028606   | .         | .     | .     | .        | .                    |  |
| Modeofdelivery             | .3800644   | .2491885  | -1.48 | 0.140 | .1051401 | 1.373871             |  |

```
-----+-----
```

\_cons | .1437552 1.44e-09 -1.9e+08 0.000 .1437552 .1437552

Note: \_cons estimates baseline risk.

Warning: parameter estimates produce inadmissible mean estimates in one or more observations.

Warning: convergence not achieved

. lrtest A

Likelihood-ratio test                      LR chi2(1) = 55.23  
(Assumption: . nested in A)              Prob > chi2 = 0.0000

.  
end of do-file

. do "C:\Users\lpomar\AppData\Local\Temp\STD3ed0\_000000.tmp"

. glm Adverseoutcomesupto2m CongZIKA Maternalinfectioninthe1sttr Prematurity, fam(bin) link(log) nolog eform  
convergence not achieved

Generalized linear models                      Number of obs = 129  
Optimization : ML                      Residual df = 125  
                                         Scale parameter = 1  
Deviance = 51.14091788                      (1/df) Deviance = .4091273  
Pearson = 185.997202                      (1/df) Pearson = 1.487978

Variance function: V(u) = u\*(1-u)              [Bernoulli]  
Link function : g(u) = ln(u)                      [Log]

                                         AIC = .4584567  
Log likelihood = -25.57045894                      BIC = -556.3356

---

|                             | OIM        |           |       |       |                      |          |  |
|-----------------------------|------------|-----------|-------|-------|----------------------|----------|--|
| Adverseoutcomesupto2m       | Risk Ratio | Std. Err. | z     | P> z  | [95% Conf. Interval] |          |  |
| CongZIKA                    | 11.95889   | 7.362507  | 4.03  | 0.000 | 3.578058             | 39.97001 |  |
| Maternalinfectioninthe1sttr | 4.878225   | 2.911104  | 2.66  | 0.008 | 1.514619             | 15.7116  |  |
| Prematurity37wg             | 9.984096   | 11.48523  | 2.00  | 0.045 | 1.047435             | 95.16785 |  |
| _cons                       | .0143084   | .0097692  | -6.22 | 0.000 | .0037534             | .0545454 |  |

---

Note: \_cons estimates baseline risk.

Warning: parameter estimates produce inadmissible mean estimates in one or more observations.

Warning: convergence not achieved

. lrtest A

Likelihood-ratio test                      LR chi2(1) = -1.68  
(Assumption: A nested in .)              Prob > chi2 = 1.0000

.  
end of do-file

. do "C:\Users\lpomar\AppData\Local\Temp\STD3ed0\_000000.tmp"

. tab Neontaldemise CongZIKA, exact

| Neontal<br>demise | CongZIKA |    | Total |
|-------------------|----------|----|-------|
|                   | 0        | 1  |       |
| 0                 | 111      | 17 | 128   |
| 1                 | 0        | 1  | 1     |
| Total             | 111      | 18 | 129   |

Fisher's exact = 0.140  
 1-sided Fisher's exact = 0.140

. glm Structuralbrain CongZIKA, fam(bin) link(log) nolog eform

Generalized linear models                      Number of obs = 129  
 Optimization : ML                              Residual df = 127  
                                                  Scale parameter = 1  
 Deviance = 50.49819596                      (1/df) Deviance = .3976236  
 Pearson = 129                                  (1/df) Pearson = 1.015748

Variance function:  $V(u) = u*(1-u)$                       [Bernoulli]  
 Link function :  $g(u) = \ln(u)$                               [Log]

                                                 AIC = .4224666  
 Log likelihood = -25.24909798                      BIC = -566.698

|                          | OIM        |           |       |       |                      |          |
|--------------------------|------------|-----------|-------|-------|----------------------|----------|
| Structuralbrainanomalies | Risk Ratio | Std. Err. | z     | P> z  | [95% Conf. Interval] |          |
| CongZIKA                 | 12.33333   | 8.138462  | 3.81  | 0.000 | 3.383713             | 44.9539  |
| _cons                    | .027027    | .0153918  | -6.34 | 0.000 | .008852              | .0825188 |

Note: \_cons estimates baseline risk.

. glm Structuralbrain CongZIKA Maternalinfectioninthe1sttr, fam(bin) link(log) nolog eform

Generalized linear models                      Number of obs = 129  
 Optimization : ML                              Residual df = 126  
                                                  Scale parameter = 1  
 Deviance = 43.76757084                      (1/df) Deviance = .3473617  
 Pearson = 167.458276                              (1/df) Pearson = 1.329034

Variance function:  $V(u) = u*(1-u)$                       [Bernoulli]  
 Link function :  $g(u) = \ln(u)$                               [Log]

                                                 AIC = .3857951  
 Log likelihood = -21.88378542                      BIC = -568.5688

|                             | OIM        |           |       |       |                      |          |
|-----------------------------|------------|-----------|-------|-------|----------------------|----------|
| Structuralbrainanomalies    | Risk Ratio | Std. Err. | z     | P> z  | [95% Conf. Interval] |          |
| CongZIKA                    | 10.49826   | 6.71045   | 3.68  | 0.000 | 2.999385             | 36.74534 |
| Maternalinfectioninthe1sttr | 4.454848   | 2.779989  | 2.39  | 0.017 | 1.311148             | 15.1361  |
| _cons                       | .014491    | .0098654  | -6.22 | 0.000 | .003816              | .055029  |

Note: \_cons estimates baseline risk.

. glm Neurologicalsymptoms CongZIKA, fam(bin) link(log) nolog eform

Generalized linear models                    Number of obs =    129  
Optimization    : ML                        Residual df    =    127  
                                              Scale parameter =    1  
Deviance        = 32.68034508                (1/df) Deviance = .2573256  
Pearson         = 128.9999999                (1/df) Pearson = 1.015748  
  
Variance function: V(u) = u\*(1-u)            [Bernoulli]  
Link function    : g(u) = ln(u)                [Log]  
  
                                              AIC            = .2843438  
Log likelihood = -16.34017254                BIC            = -584.5158

---

|                      | OIM        |           |       |       |                      |          |
|----------------------|------------|-----------|-------|-------|----------------------|----------|
| Neurologicalsymptoms | Risk Ratio | Std. Err. | z     | P> z  | [95% Conf. Interval] |          |
| CongZIKA             | 30.83333   | 32.85502  | 3.22  | 0.001 | 3.819506             | 248.9051 |
| _cons                | .009009    | .0089683  | -4.73 | 0.000 | .0012803             | .0633922 |

---

Note: \_cons estimates baseline risk.

. glm Neurologicalsymptoms CongZIKA Maternalinfectioninthe1sttr, fam(bin) link(log) nolog eform

Generalized linear models                    Number of obs =    129  
Optimization    : ML                        Residual df    =    126  
                                              Scale parameter =    1  
Deviance        = 25.5258302                (1/df) Deviance = .202586  
Pearson         = 57.99262822                (1/df) Pearson = .460259  
  
Variance function: V(u) = u\*(1-u)            [Bernoulli]  
Link function    : g(u) = ln(u)                [Log]  
  
                                              AIC            = .2443863  
Log likelihood = -12.7629151                BIC            = -586.8105

---

|                             | OIM        |           |       |       |                      |          |
|-----------------------------|------------|-----------|-------|-------|----------------------|----------|
| Neurologicalsymptoms        | Risk Ratio | Std. Err. | z     | P> z  | [95% Conf. Interval] |          |
| CongZIKA                    | 21.4455    | 22.58241  | 2.91  | 0.004 | 2.722759             | 168.913  |
| Maternalinfectioninthe1sttr | 8.609643   | 8.936448  | 2.07  | 0.038 | 1.125832             | 65.84103 |
| _cons                       | .0031805   | .0039773  | -4.60 | 0.000 | .0002742             | .036893  |

---

Note: \_cons estimates baseline risk.

\*\* Structural brain anomalies as effect-modifier?

. glm Neurologicalsymptoms CongZIKA Maternalinfectioninthe1sttr Structuralbrain, fam(bin) link(log) nolog eform

Generalized linear models                    Number of obs =    129  
Optimization    : ML                        Residual df    =    125  
                                              Scale parameter =    1



Deviance = 25.52492504 (1/df) Deviance = .2041994  
 Pearson = 58.15185761 (1/df) Pearson = .4652149

Variance function:  $V(u) = u*(1-u)$  [Bernoulli]  
 Link function :  $g(u) = \ln(u)$  [Log]

AIC = .2598831  
 Log likelihood = -12.76246252 BIC = -581.9516

|                             | OIM        |           |       |       |                      |          |
|-----------------------------|------------|-----------|-------|-------|----------------------|----------|
| Neurologicalsymptoms        | Risk Ratio | Std. Err. | z     | P> z  | [95% Conf. Interval] |          |
| CongZIKA                    | 21.23418   | 23.46672  | 2.76  | 0.006 | 2.434106             | 185.2386 |
| Maternalinfectioninthe1sttr | 8.534267   | 9.216956  | 1.99  | 0.047 | 1.027717             | 70.86939 |
| Structuralbrainanomalies    | 1.019548   | .6584403  | 0.03  | 0.976 | .287533              | 3.615157 |
| _cons                       | .0031989   | .0040463  | -4.54 | 0.000 | .0002681             | .038166  |

Note: \_cons estimates baseline risk.

. tab Neurologicalsymptoms CongZIKA if Structuralbrain==1, exact

| Neurologic<br>al  <br>symptoms | CongZIKA |   | Total |
|--------------------------------|----------|---|-------|
|                                | 0        | 1 |       |
| 0                              | 3        | 3 | 6     |
| 1                              | 0        | 3 | 3     |
| Total                          | 3        | 6 | 9     |

Fisher's exact = 0.464  
 1-sided Fisher's exact = 0.238

. glm Neurologicalsymptoms CongZIKA if Structuralbrain==0, fam(bin) link(log) nolog eform

Generalized linear models Number of obs = 120  
 Optimization : ML Residual df = 118  
 Scale parameter = 1  
 Deviance = 22.1684435 (1/df) Deviance = .1878682  
 Pearson = 120 (1/df) Pearson = 1.016949

Variance function:  $V(u) = u*(1-u)$  [Bernoulli]  
 Link function :  $g(u) = \ln(u)$  [Log]

AIC = .2180704  
 Log likelihood = -11.08422175 BIC = -542.7556

|                      | OIM        |           |       |       |                      |          |
|----------------------|------------|-----------|-------|-------|----------------------|----------|
| Neurologicalsymptoms | Risk Ratio | Std. Err. | z     | P> z  | [95% Conf. Interval] |          |
| CongZIKA             | 18         | 21.35416  | 2.44  | 0.015 | 1.759772             | 184.1148 |
| _cons                | .0092593   | .0092163  | -4.70 | 0.000 | .0013162             | .065137  |

Note: \_cons estimates baseline risk.

```
. glm Neurologicalsymptoms CongZIKA Maternalinfectioninthe1str if Structuralbrain==0, fam(bin) link(log) nolog eform
```

```
Generalized linear models      Number of obs =    120
Optimization   : ML           Residual df   =    117
                               Scale parameter =     1
Deviance       = 18.57082858   (1/df) Deviance = .158725
Pearson        = 51.83984929   (1/df) Pearson  = .4430756

Variance function: V(u) = u*(1-u)      [Bernoulli]
Link function   : g(u) = ln(u)         [Log]

                               AIC       = .2047569
Log likelihood  = -9.28541429          BIC       = -541.5657
```

```
-----+-----
```

|                            | OIM        |           |       |       |                      |          |
|----------------------------|------------|-----------|-------|-------|----------------------|----------|
| Neurologicalsymptoms       | Risk Ratio | Std. Err. | z     | P> z  | [95% Conf. Interval] |          |
| CongZIKA                   | 20.49089   | 22.96574  | 2.69  | 0.007 | 2.277994             | 184.3185 |
| Maternalinfectioninthe1str | 7.737567   | 8.565827  | 1.85  | 0.065 | .8836632             | 67.75199 |
| _cons                      | .0035561   | .0045     | -4.46 | 0.000 | .0002977             | .0424727 |

```
-----+-----
```

Note: \_cons estimates baseline risk.

```
. end of do-file
```

```
. do "C:\Users\lpomar\AppData\Local\Temp\STD3ed0_000000.tmp"
```

```
. ** Stratified on Maternal infection in the 1st trimester
. cs Adverseoutcomesupto2m CongZIKA, by(Maternalinfectioninthe1str)
```

```
Maternal infecti |    RR    [95% Conf. Interval]  M-H Weight
```

```
-----+-----
```

|              |          |                   |          |
|--------------|----------|-------------------|----------|
| 0            | 7.636364 | 1.192969 48.88143 | .2315789 |
| 1            | 11.57143 | 2.947891 45.42161 | .4117647 |
| -----+-----  |          |                   |          |
| Crude        | 12.33333 | 4.13827 36.75718  |          |
| M-H combined | 10.15496 | 3.382333 30.48876 |          |

```
-----+-----
```

```
Test of homogeneity (M-H)  chi2(1) = 0.126 Pr>chi2 = 0.7231
```

```
. end of do-file
```

```
. do "C:\Users\lpomar\AppData\Local\Temp\STD3ed0_000000.tmp"
```

```
. ** Adverse outcomes at 2years of life:
. glm Adverseoutcomesupto2y CongZIKA, fam(bin) link(log) nolog eform
```

```
Generalized linear models      Number of obs =    111
Optimization   : ML           Residual df   =    109
                               Scale parameter =     1
Deviance       = 59.47439346   (1/df) Deviance = .5456366
```

Pearson = 111 (1/df) Pearson = 1.018349

Variance function:  $V(u) = u*(1-u/1)$  [Binomial]  
Link function :  $g(u) = \ln(u)$  [Log]

AIC = .5718414  
Log likelihood = -29.73719673 BIC = -453.8644

|                       | OIM        |           |       |       |                      |          |
|-----------------------|------------|-----------|-------|-------|----------------------|----------|
| Adverseoutcomesupto2y | Risk Ratio | Std. Err. | z     | P> z  | [95% Conf. Interval] |          |
| CongZIKA              | 7.68       | 4.132834  | 3.79  | 0.000 | 2.674882             | 22.05047 |
| _cons                 | .0520833   | .0226777  | -6.79 | 0.000 | .0221858             | .1222706 |

Note: \_cons estimates baseline risk.

. est store CRUDE

\* Adjusted on maternal infection in the 1st trimester  
. glm Adverseoutcomesupto2y CongZIKA Maternalinfectioninthe1sttr, fam(bin) link(log) nolog eform

Generalized linear models Number of obs = 111  
Optimization : ML Residual df = 108  
Scale parameter = 1  
Deviance = 58.28203098 (1/df) Deviance = .5396484  
Pearson = 107.3983993 (1/df) Pearson = .9944296

Variance function:  $V(u) = u*(1-u/1)$  [Binomial]  
Link function :  $g(u) = \ln(u)$  [Log]

AIC = .5791174  
Log likelihood = -29.14101549 BIC = -450.3472

|                             | OIM        |           |       |       |                      |          |
|-----------------------------|------------|-----------|-------|-------|----------------------|----------|
| Adverseoutcomesupto2y       | Risk Ratio | Std. Err. | z     | P> z  | [95% Conf. Interval] |          |
| CongZIKA                    | 6.667957   | 3.729054  | 3.39  | 0.001 | 2.228222             | 19.95387 |
| Maternalinfectioninthe1sttr | 1.78164    | .9387635  | 1.10  | 0.273 | .6343274             | 5.004104 |
| _cons                       | .0449262   | .0209486  | -6.65 | 0.000 | .0180133             | .1120485 |

Note: \_cons estimates baseline risk.

. est store A

. lrtest CRUDE

Likelihood-ratio test LR chi2(1) = 1.19  
(Assumption: CRUDE nested in A) Prob > chi2 = 0.2749

\* Effect modifiers?  
. glm Adverseoutcomesupto2y CongZIKA Maternalinfectioninthe1sttr Maternalage, fam(bin) link(log) nolog eform

Generalized linear models Number of obs = 111

```

Optimization   : ML                      Residual df   =   107
Scale parameter =   1
Deviance       = 58.28068961             (1/df) Deviance = .5446793
Pearson        = 107.819364              (1/df) Pearson = 1.007658

Variance function: V(u) = u*(1-u/1)      [Binomial]
Link function   : g(u) = ln(u)           [Log]

AIC = .5971233
Log likelihood = -29.14034481            BIC = -445.639

```

```

-----
|               OIM
Adverseoutcomesupto2y | Risk Ratio Std. Err.   z   P>|z|   [95% Conf. Interval]
-----+-----
CongZIKA | 6.682789 3.758764  3.38 0.001  2.219196 20.12425
Maternalinfectioninthe1sttr | 1.785488 .9472611  1.09 0.275  .6311988 5.050656
Maternalageatbirthyears | .9982092 .0489371 -0.04 0.971  .9067583 1.098883
_cons | .0470907 .0643476 -2.24 0.025  .0032345 .6855956
-----

```

Note: \_cons estimates baseline risk.

. lrtest A

```

Likelihood-ratio test          LR chi2(1) =   0.00
(Assumption: A nested in .)    Prob > chi2 =  0.9708

```

. glm Adverseoutcomesupto2y CongZIKA Maternalinfectioninthe1sttr Low, fam(bin) link(log) nolog eform

```

Generalized linear models      Number of obs =   93
Optimization   : ML           Residual df   =   89
Scale parameter =   1
Deviance       = 53.6510958    (1/df) Deviance = .6028213
Pearson        = 87.58781243   (1/df) Pearson = .9841327

Variance function: V(u) = u*(1-u/1)      [Binomial]
Link function   : g(u) = ln(u)           [Log]

AIC = .662915
Log likelihood = -26.8255479            BIC = -349.7503

```

```

-----
|               OIM
Adverseoutcomesupto2y | Risk Ratio Std. Err.   z   P>|z|   [95% Conf. Interval]
-----+-----
CongZIKA | 6.628856 3.712668  3.38 0.001  2.211568 19.86904
Maternalinfectioninthe1sttr | 1.36452 .696087  0.61 0.542  .5020575 3.708567
Lowsocioeconomicstatus | 1.716076 .8379849  1.11 0.269  .6589952 4.468797
_cons | .0449557 .0232193 -6.01 0.000  .0163359 .1237158
-----

```

Note: \_cons estimates baseline risk.

. lrtest A

```

observations differ: 93 vs. 111
r(498);

```

end of do-file

r(498);

. do "C:\Users\lpomar\AppData\Local\Temp\STD3ed0\_000000.tmp"

. glm Adverseoutcomesupto2y CongZIKA Maternalinfectioninthe1sttr Alcohol, fam(bin) link(log) nolog eform

Generalized linear models                      Number of obs =     111  
 Optimization    : ML                            Residual df    =    107  
                                                   Scale parameter =     1  
 Deviance        = 58.2782245                    (1/df) Deviance = .5446563  
 Pearson         = 107.3874291                    (1/df) Pearson = 1.003621

Variance function: V(u) = u\*(1-u/1)                    [Binomial]  
 Link function    : g(u) = ln(u)                        [Log]

                                                  AIC            = .5971011  
 Log likelihood = -29.13911225                    BIC            = -445.6415

-----

|                             | OIM        |           |       |       |                      |          |  |
|-----------------------------|------------|-----------|-------|-------|----------------------|----------|--|
| Adverseoutcomesupto2y       | Risk Ratio | Std. Err. | z     | P> z  | [95% Conf. Interval] |          |  |
| CongZIKA                    | 6.652203   | 3.733947  | 3.38  | 0.001 | 2.214001             | 19.98726 |  |
| Maternalinfectioninthe1sttr | 1.772124   | .9465195  | 1.07  | 0.284 | .6220911             | 5.048174 |  |
| Alcohol                     | .9425184   | .9145275  | -0.06 | 0.951 | .1407237             | 6.31266  |  |
| _cons                       | .0453355   | .0221073  | -6.34 | 0.000 | .0174325             | .1179009 |  |

-----

Note: \_cons estimates baseline risk.

. lrtest A

Likelihood-ratio test                                      LR chi2(1) =     0.00  
 (Assumption: A nested in .)                              Prob > chi2 =    0.9508

. glm Adverseoutcomesupto2y CongZIKA Maternalinfectioninthe1sttr Smoking, fam(bin) link(log) nolog eform  
 note: Smoking != 0 predicts failure perfectly  
 Smoking dropped and 4 obs not used

Generalized linear models                      Number of obs =     106  
 Optimization    : ML                            Residual df    =    107  
                                                   Scale parameter =     1  
 Deviance        = 58.23854677                    (1/df) Deviance = .5442855  
 Pearson         = 102.9291785                    (1/df) Pearson = .9619549

Variance function: V(u) = u\*(1-u/1)                    [Binomial]  
 Link function    : g(u) = ln(u)                        [Log]

                                                  AIC            = .573422  
 Log likelihood = -28.53821188                    BIC            = -444.7129

-----

|                             | OIM        |           |      |       |                      |          |  |
|-----------------------------|------------|-----------|------|-------|----------------------|----------|--|
| Adverseoutcomesupto2y       | Risk Ratio | Std. Err. | z    | P> z  | [95% Conf. Interval] |          |  |
| CongZIKA                    | 6.847706   | 3.851057  | 3.42 | 0.001 | 2.274264             | 20.61813 |  |
| Maternalinfectioninthe1sttr | 1.641937   | .8656024  | 0.94 | 0.347 | .5842746             | 4.614196 |  |

-----

```
Smoking |      1 (omitted)
_cons | .0481465 .0222375 -6.57 0.000 .0194724 .1190447
```

-----  
Note: \_cons estimates baseline risk.

```
. lrtest A
df(unrestricted) = df(restricted) = 3
r(498);
```

end of do-file

```
r(498);
```

```
. do "C:\Users\lpomar\AppData\Local\Temp\STD3ed0_000000.tmp"
```

```
. glm Adverseoutcomesupto2y CongZIKA Maternalinfectioninthe1sttr Leadp, fam(bin) link(log) nolog eform
convergence not achieved
```

```
Generalized linear models          Number of obs =    111
Optimization   : ML                Residual df   =    109
                               Scale parameter =     1
Deviance       = 108.2702414        (1/df) Deviance = .993305
Pearson        = 100000057.9        (1/df) Pearson  = 917431.7
```

```
Variance function: V(u) = u*(1-u/1)    [Binomial]
Link function   : g(u) = ln(u)         [Log]
```

```
Log likelihood = -54.13512068        AIC      = 1.011444
                                           BIC      = -405.0686
```

```
-----+-----
```

|                             | OIM        |           |          |       |                      |          |
|-----------------------------|------------|-----------|----------|-------|----------------------|----------|
| Adverseoutcomesupto2y       | Risk Ratio | Std. Err. | z        | P> z  | [95% Conf. Interval] |          |
| CongZIKA                    | 3.46651    | .         | .        | .     | .                    | .        |
| Maternalinfectioninthe1sttr | .7715198   | .2863655  | -0.70    | 0.485 | .37274               | 1.596938 |
| Leadpoisoning               | 2.432884   | .         | .        | .     | .                    | .        |
| _cons                       | .165099    | 1.65e+09  | -1.8e+08 | 0.000 | .165099              | .165099  |

```
-----+-----
```

Note: \_cons estimates baseline risk.

Warning: parameter estimates produce inadmissible mean estimates in one or more observations.

Warning: convergence not achieved

```
.
end of do-file
```

```
. Tab Adverseoutcomesupto2y CongZIKA if Leadp==1
command Tab is unrecognized
r(199);
```

```
. tab Adverseoutcomesupto2y CongZIKA if Leadp==1
```

```
-----+-----
```

| Adverse outcomes up to 2y | CongZIKA |   | Total |
|---------------------------|----------|---|-------|
|                           | 0        | 1 |       |
|                           |          |   |       |

```
-----+-----
```

|       |   |   |   |
|-------|---|---|---|
| 0     | 4 | 1 | 5 |
| 1     | 1 | 0 | 1 |
| ----- |   |   |   |
| Total | 5 | 1 | 6 |

. tab Adverseoutcomesupto2y CongZIKA if Leadp==0

|          |          |    |       |
|----------|----------|----|-------|
| Adverse  | CongZIKA |    |       |
| outcomes | 0        | 1  | Total |
| up to 2y | -----    |    |       |
| 0        | 87       | 8  | 95    |
| 1        | 4        | 6  | 10    |
| -----    |          |    |       |
| Total    | 91       | 14 | 105   |

. do "C:\Users\lpomar\AppData\Local\Temp\STD3ed0\_000000.tmp"

. glm Adverseoutcomesupto2y CongZIKA Maternalinfectioninthe1sttr Anymaternalco, fam(bin) link(log) nolog eform

note: Anymaternalcomorbidities != 0 predicts failure perfectly  
Anymaternalcomorbidities dropped and 16 obs not used

Generalized linear models                      Number of obs =     95  
Optimization    : ML                            Residual df    =   108  
                                                  Scale parameter =     1  
Deviance        = 59.03125837                    (1/df) Deviance = .5465857  
Pearson         = 94.72467703                    (1/df) Pearson = .8770803  
  
Variance function: V(u) = u\*(1-u/1)            [Binomial]  
Link function    : g(u) = ln(u)                 [Log]  
  
                                                  AIC            = .5414375  
Log likelihood = -27.0497829                    BIC            = -449.598

|                             | OIM         |           |       |       |                      |          |  |
|-----------------------------|-------------|-----------|-------|-------|----------------------|----------|--|
| Adverseoutcomesupto2y       | Risk Ratio  | Std. Err. | z     | P> z  | [95% Conf. Interval] |          |  |
| CongZIKA                    | 7.374224    | 4.233645  | 3.48  | 0.001 | 2.393479             | 22.71972 |  |
| Maternalinfectioninthe1sttr | 1.343991    | .7123262  | 0.56  | 0.577 | .4756121             | 3.79787  |  |
| Anymaternalcomorbidities    | 1 (omitted) |           |       |       |                      |          |  |
| _cons                       | .056681     | .0255512  | -6.37 | 0.000 | .0234274             | .1371358 |  |

Note: \_cons estimates baseline risk.

. lrtest A  
df(unrestricted) = df(restricted) = 3  
r(498);

end of do-file

r(498);

. do "C:\Users\lpomar\AppData\Local\Temp\STD3ed0\_000000.tmp"

```
. glm Adverseoutcomesupto2y CongZIKA Maternalinfectioninthe1sttr Infantgender, fam(bin) link(log) nolog eform
```

```
Generalized linear models          Number of obs =    111
Optimization   : ML                 Residual df   =    107
                                   Scale parameter =     1
Deviance       = 57.75156168         (1/df) Deviance = .5397342
Pearson        = 108.0139714         (1/df) Pearson  = 1.009476
```

```
Variance function: V(u) = u*(1-u/1)      [Binomial]
Link function   : g(u) = ln(u)           [Log]
```

```
Log likelihood = -28.87578084          AIC      = .5923564
                                           BIC      = -446.1682
```

```
-----+-----
              |      OIM
Adverseoutcomesupto2y | Risk Ratio Std. Err.   z   P>|z|   [95% Conf. Interval]
-----+-----
CongZIKA | 6.499541  3.62741  3.35  0.001  2.176832  19.4062
Maternalinfectioninthe1sttr | 1.836386 .9526067  1.17  0.241  .6643724  5.075937
Infantgender | .6968215 .3475328 -0.72  0.469  .2621762  1.852038
   _cons | .0538296 .0280132 -5.61  0.000  .0194111  .1492765
-----+-----
```

Note: \_cons estimates baseline risk.

```
. lrtest A
```

```
Likelihood-ratio test          LR chi2(1) =    0.53
(Assumption: A nested in .)     Prob > chi2 =  0.4664
```

```
. end of do-file
```

```
. do "C:\Users\lpomar\AppData\Local\Temp\STD3ed0_000000.tmp"
```

```
. glm Adverseoutcomesupto2y CongZIKA Maternalinfectioninthe1sttr Twins, fam(bin) link(log) nolog eform
note: Twins != 0 predicts failure perfectly
     Twins dropped and 5 obs not used
```

```
Generalized linear models          Number of obs =    106
Optimization   : ML                 Residual df   =    108
                                   Scale parameter =     1
Deviance       = 58.29501464         (1/df) Deviance = .5397687
Pearson        = 103.3580007         (1/df) Pearson  = .9570185
```

```
Variance function: V(u) = u*(1-u/1)      [Binomial]
Link function   : g(u) = ln(u)           [Log]
```

```
Log likelihood = -28.90493481          AIC      = .5748637
                                           BIC      = -450.3342
```

```
-----+-----
              |      OIM
Adverseoutcomesupto2y | Risk Ratio Std. Err.   z   P>|z|   [95% Conf. Interval]
-----+-----
CongZIKA | 6.417676  3.56332  3.35  0.001  2.161527  19.05438
-----+-----
```



```
Maternalinfectioninthe1sttr | 1.743244 .912558 1.06 0.288 .6248401 4.863483
Twins | 1 (omitted)
_cons | .0473565 .0221332 -6.53 0.000 .0189474 .1183609
```

-----  
Note: \_cons estimates baseline risk.

```
. lrtest A
df(unrestricted) = df(restricted) = 3
r(498);
```

end of do-file

```
r(498);
```

```
. do "C:\Users\lpomar\AppData\Local\Temp\STD3ed0_000000.tmp"
```

```
. glm Adverseoutcomesupto2y CongZIKA Maternalinfectioninthe1sttr Modeofdelivery, fam(bin) link(log) nolog eform
```

```
Generalized linear models          Number of obs =    111
Optimization   : ML                Residual df   =    107
                               Scale parameter =     1
Deviance       = 57.99576103        (1/df) Deviance = .5420165
Pearson        = 105.1992692        (1/df) Pearson  = .9831707
```

```
Variance function: V(u) = u*(1-u/1)      [Binomial]
Link function   : g(u) = ln(u)           [Log]
```

```
Log likelihood = -28.99788052          AIC      = .5945564
                                           BIC      = -445.924
```

```
-----
|              OIM
Adverseoutcomesupto2y | Risk Ratio  Std. Err.   z   P>|z|   [95% Conf. Interval]
-----+-----
CongZIKA | 6.639172  3.681354   3.41  0.001   2.239398  19.68324
Maternalinfectioninthe1sttr | 1.912284  1.010029   1.23  0.220   .6791498  5.384424
Modeofdelivery | .6487064  .5848379  -0.48  0.631   .1108286  3.797034
_cons | .0457759  .0214718  -6.57  0.000   .0182545  .1147899
-----
```

Note: \_cons estimates baseline risk.

```
. lrtest A
```

```
Likelihood-ratio test          LR chi2(1) =    0.29
(Assumption: A nested in .)    Prob > chi2 =    0.5926
```

end of do-file

```
. do "C:\Users\lpomar\AppData\Local\Temp\STD3ed0_000000.tmp"
```

```
. glm Adverseoutcomesupto2y CongZIKA Maternalinfectioninthe1sttr Prematurity, fam(bin) link(log) nolog eform
```

```
Generalized linear models          Number of obs =    111
Optimization   : ML                Residual df   =    107
                               Scale parameter =     1
```

Deviance = 56.88109024 (1/df) Deviance = .531599  
 Pearson = 104.0412757 (1/df) Pearson = .9723484

Variance function:  $V(u) = u*(1-u/1)$  [Binomial]  
 Link function :  $g(u) = \ln(u)$  [Log]

Log likelihood = -28.44054512 AIC = .5845143  
 BIC = -447.0386

---

|                             | OIM        |           |       |       |                      |          |
|-----------------------------|------------|-----------|-------|-------|----------------------|----------|
| Adverseoutcomesupto2y       | Risk Ratio | Std. Err. | z     | P> z  | [95% Conf. Interval] |          |
| CongZIKA                    | 7.666233   | 4.622367  | 3.38  | 0.001 | 2.35152              | 24.99282 |
| Maternalinfectioninthe1sttr | 1.923627   | 1.057265  | 1.19  | 0.234 | .6550628             | 5.648833 |
| Prematurity37wg             | 4.495911   | 4.734269  | 1.43  | 0.153 | .5708058             | 35.41172 |
| _cons                       | .0370707   | .0194581  | -6.28 | 0.000 | .0132508             | .1037096 |

---

Note: \_cons estimates baseline risk.

. lrtest A

Likelihood-ratio test LR chi2(1) = 1.40  
 (Assumption: A nested in .) Prob > chi2 = 0.2366

end of do-file

. do "C:\Users\lpomar\AppData\Local\Temp\STD3ed0\_000000.tmp"

. \* Sub-analysis

. tab Adverseoutcomesupto2y CongZIKA if Structural==1

| Adverse  | CongZIKA |   |       |
|----------|----------|---|-------|
| outcomes | 0        | 1 | Total |
| up to 2y |          |   |       |
| 0        | 1        | 1 | 2     |
| 1        | 2        | 4 | 6     |
| Total    | 3        | 5 | 8     |

. glm Adverseoutcomesupto2y CongZIKA if Structural==1, fam(bin) link(log) nolog eform

Generalized linear models Number of obs = 8  
 Optimization : ML Residual df = 6  
 Scale parameter = 1  
 Deviance = 8.823109245 (1/df) Deviance = 1.470518  
 Pearson = 8 (1/df) Pearson = 1.333333

Variance function:  $V(u) = u*(1-u/1)$  [Binomial]  
 Link function :  $g(u) = \ln(u)$  [Log]

Log likelihood = -4.411554623 AIC = 1.602889  
 BIC = -3.65354

---

|                       | OIM        |           |       |       |                      |          |
|-----------------------|------------|-----------|-------|-------|----------------------|----------|
| Adverseoutcomesupto2y | Risk Ratio | Std. Err. | z     | P> z  | [95% Conf. Interval] |          |
| CongZIKA              | 1.2        | .5585696  | 0.39  | 0.695 | .4819128             | 2.988092 |
| _cons                 | .6666667   | .2721655  | -0.99 | 0.321 | .2995071             | 1.483919 |

Note: \_cons estimates baseline risk.

. glm Adverseoutcomesupto2y CongZIKA Maternalinfectioninthe1sttr if Structural==1, fam(bin) link(log) nolog eform  
convergence not achieved

Generalized linear models                      Number of obs =        8  
Optimization    : ML                            Residual df     =       6  
                                                  Scale parameter =        1  
Deviance        = 8.823109245                    (1/df) Deviance = 1.470518  
Pearson         = 7.988612804                    (1/df) Pearson = 1.331435

Variance function: V(u) = u\*(1-u/1)                    [Binomial]  
Link function    : g(u) = ln(u)                         [Log]

                                                  AIC                = 1.602889  
Log likelihood = -4.411554623                    BIC                = -3.65354

|                             | OIM        |           |       |       |                      |          |
|-----------------------------|------------|-----------|-------|-------|----------------------|----------|
| Adverseoutcomesupto2y       | Risk Ratio | Std. Err. | z     | P> z  | [95% Conf. Interval] |          |
| CongZIKA                    | 1.095445   | .509902   | 0.20  | 0.845 | .4399242             | 2.727743 |
| Maternalinfectioninthe1sttr | 1.095445   | .         | .     | .     | .                    | .        |
| _cons                       | .6666667   | .2721655  | -0.99 | 0.321 | .2995071             | 1.483919 |

Note: \_cons estimates baseline risk.

Warning: convergence not achieved

. tab Adverseoutcomesupto2y CongZIKA if Structural==0

| Adverse outcomes up to 2y | CongZIKA |    | Total |
|---------------------------|----------|----|-------|
|                           | 0        | 1  |       |
| 0                         | 90       | 8  | 98    |
| 1                         | 3        | 2  | 5     |
| Total                     | 93       | 10 | 103   |

. glm Adverseoutcomesupto2y CongZIKA if Structural==0, fam(bin) link(log) nolog eform

Generalized linear models                      Number of obs =        103  
Optimization    : ML                            Residual df     =      101  
                                                  Scale parameter =        1  
Deviance        = 36.51413981                    (1/df) Deviance = .3615261  
Pearson         = 102.9999995                    (1/df) Pearson = 1.019802

Variance function: V(u) = u\*(1-u/1)                    [Binomial]  
Link function    : g(u) = ln(u)                         [Log]

AIC = .3933412  
 Log likelihood = -18.2570699 BIC = -431.5935

```
-----+-----
          |           OIM
Adverseoutcomesupto2y | Risk Ratio Std. Err.   z P>|z|   [95% Conf. Interval]
-----+-----
CongZIKA |      6.2  5.270294   2.15 0.032   1.171737   32.80601
  _cons |   .0322581 .0183213  -6.05 0.000   .0105971   .0981948
-----+-----
```

Note: \_cons estimates baseline risk.

. glm Adverseoutcomesupto2y CongZIKA Maternalinfectioninthe1sttr if Structural==0, fam(bin) link(log) nolog eform

Generalized linear models                      Number of obs =     103  
 Optimization    : ML                              Residual df    =    100  
                                                  Scale parameter =     1  
 Deviance        = 36.50351232                    (1/df) Deviance = .3650351  
 Pearson         = 104.3085701                    (1/df) Pearson = 1.043086

Variance function: V(u) = u\*(1-u/1)            [Binomial]  
 Link function    : g(u) = ln(u)                [Log]

AIC = .4126555  
 Log likelihood = -18.25175616 BIC = -426.9694

```
-----+-----
          |           OIM
Adverseoutcomesupto2y | Risk Ratio Std. Err.   z P>|z|   [95% Conf. Interval]
-----+-----
CongZIKA | 6.229669 5.300758   2.15 0.032   1.175403   33.01743
Maternalinfectioninthe1sttr | .8979346 .9501202  -0.10 0.919   .1128687   7.14358
  _cons |   .0329284 .0197506  -5.69 0.000   .0101628   .1066905
-----+-----
```

Note: \_cons estimates baseline risk.

. tab Neurologicimpairments CongZIKA, freq

```
Neurologic |
impairment |      CongZIKA
s |      0      1 | Total
-----+-----
0 |     92     10 |    102
1 |      4      5 |      9
-----+-----
Total |     96     15 |    111
```

. glm Neurologicimpairments CongZIKA, fam(bin) link(log) nolog eform

Generalized linear models                      Number of obs =     111  
 Optimization    : ML                              Residual df    =    109  
                                                  Scale parameter =     1  
 Deviance        = 52.35082474                    (1/df) Deviance = .4802828  
 Pearson         =     111                        (1/df) Pearson = 1.018349

Variance function:  $V(u) = u*(1-u/1)$  [Binomial]  
 Link function :  $g(u) = \ln(u)$  [Log]

AIC = .5076651  
 Log likelihood = -26.17541237 BIC = -460.988

|                       | OIM        |           |       |       |                      |          |
|-----------------------|------------|-----------|-------|-------|----------------------|----------|
| Neurologicimpairments | Risk Ratio | Std. Err. | z     | P> z  | [95% Conf. Interval] |          |
| CongZIKA              | 8          | 4.885352  | 3.41  | 0.001 | 2.417061             | 26.47844 |
| _cons                 | .0416667   | .0203947  | -6.49 | 0.000 | .0159643             | .1087498 |

Note: \_cons estimates baseline risk.

. glm Neurologicimpairments CongZIKA Maternalinfectioninthe1sttr, fam(bin) link(log) nolog eform

Generalized linear models Number of obs = 111  
 Optimization : ML Residual df = 108  
 Scale parameter = 1  
 Deviance = 51.25680245 (1/df) Deviance = .4746  
 Pearson = 114.8890414 (1/df) Pearson = 1.063787

Variance function:  $V(u) = u*(1-u/1)$  [Binomial]  
 Link function :  $g(u) = \ln(u)$  [Log]

AIC = .515827  
 Log likelihood = -25.62840122 BIC = -457.3725

|                             | OIM        |           |       |       |                      |          |
|-----------------------------|------------|-----------|-------|-------|----------------------|----------|
| Neurologicimpairments       | Risk Ratio | Std. Err. | z     | P> z  | [95% Conf. Interval] |          |
| CongZIKA                    | 7.129378   | 4.438435  | 3.16  | 0.002 | 2.104414             | 24.15305 |
| Maternalinfectioninthe1sttr | 1.875192   | 1.10714   | 1.06  | 0.287 | .5895002             | 5.964958 |
| _cons                       | .0351488   | .0185808  | -6.33 | 0.000 | .012472              | .0990567 |

Note: \_cons estimates baseline risk.

. tab Delayinmotoracquisitions CongZIKA, freq

| Delay in  <br>motor  <br>acquisitio | CongZIKA |    |       |
|-------------------------------------|----------|----|-------|
|                                     | 0        | 1  | Total |
| 0                                   | 95       | 13 | 108   |
| 1                                   | 1        | 2  | 3     |
| Total                               | 96       | 15 | 111   |

. glm Delayinmotoracquisitions CongZIKA, fam(bin) link(log) nolog eform

Generalized linear models Number of obs = 111  
 Optimization : ML Residual df = 109  
 Scale parameter = 1

Deviance = 22.89847737 (1/df) Deviance = .2100778  
 Pearson = 111 (1/df) Pearson = 1.018349

Variance function:  $V(u) = u*(1-u/1)$  [Binomial]  
 Link function :  $g(u) = \ln(u)$  [Log]

Log likelihood = -11.44923869 AIC = .2423286  
 BIC = -490.4403

|                          | OIM        |           |       |       |                      |          |
|--------------------------|------------|-----------|-------|-------|----------------------|----------|
| Delayinmotoracquisitions | Risk Ratio | Std. Err. | z     | P> z  | [95% Conf. Interval] |          |
| CongZIKA                 | 12.8       | 15.26862  | 2.14  | 0.033 | 1.235507             | 132.6096 |
| _cons                    | .0104167   | .0103623  | -4.59 | 0.000 | .0014824             | .0731957 |

Note: \_cons estimates baseline risk.

. glm Delayinmotoracquisitions CongZIKA Maternalinfectioninthe1sttr, fam(bin) link(log) nolog eform

Generalized linear models Number of obs = 111  
 Optimization : ML Residual df = 108  
 Scale parameter = 1  
 Deviance = 21.50365408 (1/df) Deviance = .1991079  
 Pearson = 60.33332903 (1/df) Pearson = .5586419

Variance function:  $V(u) = u*(1-u/1)$  [Binomial]  
 Link function :  $g(u) = \ln(u)$  [Log]

Log likelihood = -10.75182704 AIC = .2477807  
 BIC = -487.1256

|                             | OIM        |           |       |       |                      |          |
|-----------------------------|------------|-----------|-------|-------|----------------------|----------|
| Delayinmotoracquisitions    | Risk Ratio | Std. Err. | z     | P> z  | [95% Conf. Interval] |          |
| CongZIKA                    | 9.000001   | 11.03903  | 1.79  | 0.073 | .8131929             | 99.60738 |
| Maternalinfectioninthe1sttr | 3.923077   | 4.78711   | 1.12  | 0.263 | .3588837             | 42.88447 |
| _cons                       | .0065359   | .0076315  | -4.31 | 0.000 | .0006629             | .0644446 |

Note: \_cons estimates baseline risk.

. tab Neurosensoryalterations CongZIKA, freq

| Neurosenso | CongZIKA |    | Total |
|------------|----------|----|-------|
| ry         | 0        | 1  |       |
| alteration |          |    |       |
| s          | 0        | 1  | Total |
| 0          | 95       | 12 | 107   |
| 1          | 1        | 3  | 4     |
| Total      | 96       | 15 | 111   |

. glm Neurosensoryalterations CongZIKA, fam(bin) link(log) nolog eform

Generalized linear models                    Number of obs =    111  
 Optimization    : ML                        Residual df    =    109  
                                                  Scale parameter =    1  
 Deviance        = 26.13031606                (1/df) Deviance = .2397277  
 Pearson         = 110.9999985                (1/df) Pearson = 1.018349

Variance function:  $V(u) = u*(1-u/1)$                 [Binomial]  
 Link function    :  $g(u) = \ln(u)$                         [Log]

                                                 AIC        = .2714443  
 Log likelihood = -13.06515803                BIC            = -487.2085

```

-----
                                                 OIM
Neurosensoryalterations | Risk Ratio  Std. Err.   z  P>|z|  [95% Conf. Interval]
-----+-----
      CongZIKA |    19.2  21.51985   2.64  0.008   2.134287  172.7228
      _cons |   .0104167  .0103623  -4.59  0.000   .0014824  .0731957
-----

```

Note: \_cons estimates baseline risk.

. glm Neurosensoryalterations CongZIKA Maternalinfectioninthe1sttr, fam(bin) link(log) nolog eform

Generalized linear models                    Number of obs =    111  
 Optimization    : ML                        Residual df    =    108  
                                                  Scale parameter =    1  
 Deviance        = 25.66113713                (1/df) Deviance = .2376031  
 Pearson         = 185.4801619                (1/df) Pearson = 1.717409

Variance function:  $V(u) = u*(1-u/1)$                 [Binomial]  
 Link function    :  $g(u) = \ln(u)$                         [Log]

                                                 AIC        = .2852355  
 Log likelihood = -12.83056856                BIC            = -482.9681

```

-----
                                                 OIM
Neurosensoryalterations | Risk Ratio  Std. Err.   z  P>|z|  [95% Conf. Interval]
-----+-----
      CongZIKA |  22.47253  25.37779   2.76  0.006   2.45701  205.5404
Maternalinfectioninthe1sttr | .4965815  .5383341  -0.65  0.518   .0593226  4.156819
      _cons |   .0115768  .0115947  -4.45  0.000   .0016258  .082434
-----

```

Note: \_cons estimates baseline risk.

. cs Adverseoutcomesupto2y CongZIKA, by(Maternalinfectioninthe1sttr)

```

-----
Maternal infecti |    RR    [95% Conf. Interval]  M-H Weight
-----+-----
      0 |  8.444444  1.993798  35.76523   .3176471
      1 |        5  1.072846  23.30251   .4615385
-----+-----
      Crude |    7.68  2.674882  22.05047
      M-H combined |  6.404181  2.23786  18.32712
-----

```

Test of homogeneity (M-H)     $\chi^2(1) = 0.240$  Pr> $\chi^2 = 0.6239$

.  
end of do-file

. do "C:\Users\lpomar\AppData\Local\Temp\STD3ed0\_000000.tmp"

. \*\* Adverse outcomes at 3years of life:  
. tab Neurodevelopment2SDat3y CongZIKA

| Neurodevelopment | CongZIKA |    | Total |
|------------------|----------|----|-------|
| <-2SD at         | 0        | 1  |       |
| 3y               |          |    |       |
| 0                | 44       | 4  | 48    |
| 1                | 7        | 7  | 14    |
| Total            | 51       | 11 | 62    |

. glm Neurodevelopment2SDat3y CongZIKA, fam(bin) link(log) nolog eform

Generalized linear models                      Number of obs =        62  
Optimization    : ML                            Residual df    =       60  
                                                 Scale parameter =        1  
Deviance        = 55.21538369                    (1/df) Deviance = .9202564  
Pearson         = 61.99999999                    (1/df) Pearson = 1.033333

Variance function:  $V(u) = u*(1-u/1)$                     [Binomial]  
Link function    :  $g(u) = \ln(u)$                             [Log]

                                                 AIC            = .9550868  
Log likelihood = -27.60769185                    BIC             = -192.4127

---

|                         | OIM        |          | Std. Err. | z     | P> z     | [95% Conf. Interval] |
|-------------------------|------------|----------|-----------|-------|----------|----------------------|
| Neurodevelopment2SDat3y | Risk Ratio |          |           |       |          |                      |
| CongZIKA                | 4.636364   | 1.940623 | 3.66      | 0.000 | 2.041238 | 10.5308              |
| _cons                   | .1372549   | .0481859 | -5.66     | 0.000 | .0689759 | .2731229             |

---

Note: \_cons estimates baseline risk.

. est store CRUDE

. \* Adjusted on maternal infection in the 1st trimester  
. glm Neurodevelopment2SDat3y CongZIKA Maternalinfectioninthe1sttr, fam(bin) link(log) nolog eform

Generalized linear models                      Number of obs =        62  
Optimization    : ML                            Residual df    =       59  
                                                 Scale parameter =        1  
Deviance        = 54.33232261                    (1/df) Deviance = .9208868  
Pearson         = 61.13050756                    (1/df) Pearson = 1.03611

Variance function:  $V(u) = u*(1-u/1)$                     [Binomial]  
Link function    :  $g(u) = \ln(u)$                             [Log]



AIC = .973102  
 Log likelihood = -27.16616131 BIC = -189.1686

```

-----
|           OIM
Neurodevelopment2SDat3y | Risk Ratio  Std. Err.   z  P>|z|  [95% Conf. Interval]
-----+-----
CongZIKA | 4.432214  1.867274   3.53 0.000   1.940943  10.12112
Maternalinfectioninthe1str | 1.431828  .5386402   0.95 0.340   .6849787  2.992987
  _cons | .1222047  .0461757  -5.56 0.000   .0582716  .2562823
-----

```

Note: \_cons estimates baseline risk.

. est store A

. lrtest CRUDE

Likelihood-ratio test                      LR chi2(1) =    0.88  
 (Assumption: CRUDE nested in A)              Prob > chi2 =   0.3474

. \* Effect modifiers?

. glm Neurodevelopment2SDat3y CongZIKA Maternalinfectioninthe1str Maternalage, fam(bin) link(log) nolog eform

Generalized linear models                      Number of obs =    62  
 Optimization    : ML                          Residual df    =    58  
                                                  Scale parameter =    1  
 Deviance        = 54.30076072                  (1/df) Deviance =   .93622  
 Pearson         = 60.23498069                  (1/df) Pearson =   1.038534

Variance function: V(u) = u\*(1-u/1)              [Binomial]  
 Link function    : g(u) = ln(u)                    [Log]

AIC = 1.004851  
 Log likelihood = -27.15038036 BIC = -185.073

```

-----
|           OIM
Neurodevelopment2SDat3y | Risk Ratio  Std. Err.   z  P>|z|  [95% Conf. Interval]
-----+-----
CongZIKA | 4.362711  1.877119   3.42 0.001   1.877219  10.13907
Maternalinfectioninthe1str | 1.467104  .593885   0.95 0.344   .6635809  3.243606
  Maternalageatbirthyears | 1.005938  .0337233   0.18 0.860   .9419665  1.074255
  _cons | .1033932  .1065144  -2.20 0.028   .0137276  .7787333
-----

```

Note: \_cons estimates baseline risk.

. lrtest A

Likelihood-ratio test                      LR chi2(1) =    0.03  
 (Assumption: A nested in .)                  Prob > chi2 =   0.8590

. glm Neurodevelopment2SDat3y CongZIKA Maternalinfectioninthe1str Low, fam(bin) link(log) nolog eform  
 convergence not achieved

Generalized linear models                      Number of obs =    60

Optimization : ML Residual df = 56  
 Scale parameter = 1  
 Deviance = 52.70108623 (1/df) Deviance = .9410908  
 Pearson = 61.34982158 (1/df) Pearson = 1.095533  
 Variance function:  $V(u) = u*(1-u/1)$  [Binomial]  
 Link function :  $g(u) = \ln(u)$  [Log]  
 AIC = 1.011685  
 Log likelihood = -26.35054311 BIC = -176.5822

---

|                            | OIM        |           |       |       |                      |          |
|----------------------------|------------|-----------|-------|-------|----------------------|----------|
| Neurodevelopment2SDat3y    | Risk Ratio | Std. Err. | z     | P> z  | [95% Conf. Interval] |          |
| CongZIKA                   | 4.959629   | 2.066594  | 3.84  | 0.000 | 2.191633             | 11.22356 |
| Maternalinfectioninthe1str | 1.892683   | .8958861  | 1.35  | 0.178 | .74846               | 4.78616  |
| Lowsocioeconomicstatus     | 1.879118   | .8997054  | 1.32  | 0.188 | .7352012             | 4.802882 |
| _cons                      | .0784325   | .0461682  | -4.32 | 0.000 | .0247427             | .2486247 |

---

Note: \_cons estimates baseline risk.  
 Warning: parameter estimates produce inadmissible mean estimates in one or more observations.  
 Warning: convergence not achieved

. lrtest A  
 observations differ: 60 vs. 62  
 r(498);

end of do-file

r(498);

. do "C:\Users\lpomar\AppData\Local\Temp\STD3ed0\_000000.tmp"

. glm Neurodevelopment2SDat3y CongZIKA Maternalinfectioninthe1str Alcohol, fam(bin) link(log) nolog eform  
 convergence not achieved

Generalized linear models Number of obs = 62  
 Optimization : ML Residual df = 60  
 Scale parameter = 1  
 Deviance = 97.87058364 (1/df) Deviance = 1.631176  
 Pearson = 100000055.6 (1/df) Pearson = 1666668  
 Variance function:  $V(u) = u*(1-u/1)$  [Binomial]  
 Link function :  $g(u) = \ln(u)$  [Log]  
 AIC = 1.643074  
 Log likelihood = -48.93529182 BIC = -149.7575

---

|                            | OIM        |           |       |       |                      |         |
|----------------------------|------------|-----------|-------|-------|----------------------|---------|
| Neurodevelopment2SDat3y    | Risk Ratio | Std. Err. | z     | P> z  | [95% Conf. Interval] |         |
| CongZIKA                   | 2.139565   | .         | .     | .     | .                    | .       |
| Maternalinfectioninthe1str | 1.265906   | .         | .     | .     | .                    | .       |
| Alcohol                    | .1674685   | .1603071  | -1.87 | 0.062 | .0256526             | 1.09329 |

\_cons | .3858783 3.86e-09 -9.5e+07 0.000 .3858783 .3858783

Note: \_cons estimates baseline risk.

Warning: parameter estimates produce inadmissible mean estimates in one or more observations.

Warning: convergence not achieved

end of do-file

. tab Neurodevelopment2SDat3y CongZIKA if Alcohol==1

| Neurodevelopment<br><-2SD at<br>3y | CongZIKA |   | Total |
|------------------------------------|----------|---|-------|
|                                    | 0        | 1 |       |
| 0                                  | 11       | 1 | 12    |
| 1                                  | 1        | 0 | 1     |
| Total                              | 12       | 1 | 13    |

. tab Neurodevelopment2SDat3y CongZIKA if Alcohol==0

| Neurodevelopment<br><-2SD at<br>3y | CongZIKA |    | Total |
|------------------------------------|----------|----|-------|
|                                    | 0        | 1  |       |
| 0                                  | 33       | 3  | 36    |
| 1                                  | 6        | 7  | 13    |
| Total                              | 39       | 10 | 49    |

. do "C:\Users\lpomar\AppData\Local\Temp\STD3ed0\_000000.tmp"

. glm Neurodevelopment2SDat3y CongZIKA Maternalinfectioninthe1str Smoking, fam(bin) link(log) nolog eform  
note: Smoking != 0 predicts failure perfectly  
Smoking dropped and 2 obs not used

Generalized linear models                      Number of obs =     59  
Optimization    : ML                            Residual df       =   58  
                                                  Scale parameter =     1  
Deviance        = 54.08660189                    (1/df) Deviance = .9325276  
Pearson         = 58.53110455                    (1/df) Pearson = 1.009157

Variance function: V(u) = u\*(1-u/1)            [Binomial]  
Link function     : g(u) = ln(u)                 [Log]

                                                  AIC            = .9736936  
Log likelihood = -26.69765599                    BIC            = -184.3441

|                         |            | OIM       |   |      |                      |
|-------------------------|------------|-----------|---|------|----------------------|
| Neurodevelopment2SDat3y | Risk Ratio | Std. Err. | z | P> z | [95% Conf. Interval] |
| -----                   |            |           |   |      |                      |

```

CongZIKA | 4.16078 1.748102 3.39 0.001 1.826218 9.479752
Maternalinfectioninthe1str | 1.437647 .540676 0.97 0.334 .6879061 3.004523
Smoking | 1 (omitted)
_cons | .1298248 .0487985 -5.43 0.000 .0621453 .2712106

```

-----  
Note: \_cons estimates baseline risk.

```

. lrtest A
df(unrestricted) = df(restricted) = 3
r(498);

```

end of do-file

```
r(498);
```

```
. do "C:\Users\lpomar\AppData\Local\Temp\STD3ed0_000000.tmp"
```

```
. glm Neurodevelopment2SDat3y CongZIKA Maternalinfectioninthe1str Leadp, fam(bin) link(log) nolog eform
convergence not achieved
```

```

Generalized linear models          Number of obs =    62
Optimization   : ML                Residual df   =    60
                                Scale parameter =     1
Deviance       = 100.2234335        (1/df) Deviance = 1.670391
Pearson        = 100000046.9        (1/df) Pearson  = 1666667

```

```

Variance function: V(u) = u*(1-u/1)      [Binomial]
Link function   : g(u) = ln(u)           [Log]

```

```

                                AIC      = 1.681023
Log likelihood = -50.11171674          BIC      = -147.4046

```

```

-----
|           OIM
Neurodevelopment2SDat3y | Risk Ratio Std. Err.   z   P>|z|   [95% Conf. Interval]
-----+-----
CongZIKA | 2.495347      .      .      .      .
Maternalinfectioninthe1str | 1.42363      .      .      .      .
Leadpoisoning | 1.066297 .870057  0.08  0.937  .2154423  5.277468
_cons | .3128134 3.13e-09 -1.2e+08 0.000 .3128134 .3128134

```

-----  
Note: \_cons estimates baseline risk.

Warning: parameter estimates produce inadmissible mean estimates in one or more observations.

Warning: convergence not achieved

```
. lrtest A
```

```

Likelihood-ratio test          LR chi2(1) = 45.89
(Assumption: . nested in A)    Prob > chi2 = 0.0000

```

end of do-file

```
. tab Neurodevelopment2SDat3y CongZIKA if Leadp==0
```

```
Neurodevel |
```

| Neurodevelopment<br><-2SD at<br>3y | CongZIKA  |           | Total     |
|------------------------------------|-----------|-----------|-----------|
|                                    | 0         | 1         |           |
| 0                                  | 42        | 4         | 46        |
| 1                                  | 6         | 7         | 13        |
| <b>Total</b>                       | <b>48</b> | <b>11</b> | <b>59</b> |

```
. tab Neurodevelopment2SDat3y CongZIKA if Leadp==1
```

| Neurodevelopment<br><-2SD at<br>3y | CongZIKA |          | Total |
|------------------------------------|----------|----------|-------|
|                                    | 0        | 1        |       |
| 0                                  | 2        | 2        |       |
| 1                                  | 1        | 1        |       |
| <b>Total</b>                       | <b>3</b> | <b>3</b> |       |

```
. do "C:\Users\lpomar\AppData\Local\Temp\STD3ed0_000000.tmp"
```

```
. glm Neurodevelopment2SDat3y CongZIKA Maternalinfectioninthe1sttr Anymaternalco, fam(bin) link(log) nolog eform
```

```
note: Anymaternalcomorbidities != 0 predicts failure perfectly  
Anymaternalcomorbidities dropped and 11 obs not used
```

```
--Break--  
r(1);
```

```
end of do-file
```

```
--Break--  
r(1);
```

```
. tab Neurodevelopment2SDat3y CongZIKA if Anymaternal==1  
Anymaternal not found  
r(111);
```

```
. tab Neurodevelopment2SDat3y CongZIKA if Anymaternal==1
```

| Neurodevelopment<br><-2SD at<br>3y | CongZIKA |          | Total     |
|------------------------------------|----------|----------|-----------|
|                                    | 0        | 1        |           |
| 0                                  | 8        | 3        | 11        |
| <b>Total</b>                       | <b>8</b> | <b>3</b> | <b>11</b> |

```
. tab Neurodevelopment2SDat3y CongZIKA if Anymaternal==0
```

| Neurodevelopment<br><-2SD at<br>3y | CongZIKA |          | Total    |
|------------------------------------|----------|----------|----------|
|                                    | 0        | 1        |          |
| 0                                  |          |          |          |
| 1                                  |          |          |          |
| <b>Total</b>                       | <b>0</b> | <b>1</b> | <b>1</b> |

|       |    |   |    |
|-------|----|---|----|
| 0     | 36 | 1 | 37 |
| 1     | 7  | 7 | 14 |
| Total | 43 | 8 | 51 |

. do "C:\Users\lpomar\AppData\Local\Temp\STD3ed0\_000000.tmp"

. glm Neurodevelopment2SDat3y CongZIKA Maternalinfectioninthe1str Infantgender, fam(bin) link(log) nolog eform  
convergence not achieved

Generalized linear models                      Number of obs =        62  
Optimization : ML                              Residual df =        60  
                                                 Scale parameter =        1  
Deviance = 90.4375652                      (1/df) Deviance = 1.507293  
Pearson = 100000047.9                      (1/df) Pearson = 1666667

Variance function: V(u) = u\*(1-u/1)                      [Binomial]  
Link function : g(u) = ln(u)                      [Log]

                                                 AIC = 1.523187  
Log likelihood = -45.2187826                      BIC = -157.1905

|                            | OIM        |           |          |       |                      |          |
|----------------------------|------------|-----------|----------|-------|----------------------|----------|
| Neurodevelopment2SDat3y    | Risk Ratio | Std. Err. | z        | P> z  | [95% Conf. Interval] |          |
| CongZIKA                   | 2.135364   | .         | .        | .     | .                    |          |
| Maternalinfectioninthe1str | 1.352287   | .         | .        | .     | .                    |          |
| Infantgender               | .3170819   | .1175789  | -3.10    | 0.002 | .1532967             | .6558587 |
| _cons                      | .4065965   | 4.07e-09  | -9.0e+07 | 0.000 | .4065965             | .4065965 |

Note: \_cons estimates baseline risk.  
Warning: parameter estimates produce inadmissible mean estimates in one or more observations.  
Warning: convergence not achieved

. lrtest A

Likelihood-ratio test                      LR chi2(1) = 36.11  
(Assumption: . nested in A)                      Prob > chi2 = 0.0000

. end of do-file

. tab Neurodevelopment2SDat3y Infantgender, chi2

|            |               |    |       |
|------------|---------------|----|-------|
| Neurodevel |               |    |       |
| opment     |               |    |       |
| <-2SD at   | Infant gender |    |       |
| 3y         | 0             | 1  | Total |
| 0          | 16            | 32 | 48    |
| 1          | 8             | 6  | 14    |
| Total      | 24            | 38 | 62    |

Pearson chi2(1) = 2.5898 Pr = 0.108

. glm Neurodevelopment2SDat3y CongZIKA Infantgender, fam(bin) link(log) nolog eform

Generalized linear models                      Number of obs =        62  
Optimization    : ML                            Residual df    =        59  
                                                 Scale parameter =        1  
Deviance        = 52.950206                      (1/df) Deviance = .8974611  
Pearson         = 63.68186783                     (1/df) Pearson = 1.079354

Variance function: V(u) = u\*(1-u/1)            [Binomial]  
Link function    : g(u) = ln(u)                 [Log]

                                                 AIC        = .9508098  
Log likelihood = -26.475103                      BIC            = -190.5507

---

|                         | OIM        |           |       |       |                      |          |
|-------------------------|------------|-----------|-------|-------|----------------------|----------|
| Neurodevelopment2SDat3y | Risk Ratio | Std. Err. | z     | P> z  | [95% Conf. Interval] |          |
| CongZIKA                | 4.286504   | 1.776361  | 3.51  | 0.000 | 1.902648             | 9.657126 |
| Infantgender            | .5602415   | .2291838  | -1.42 | 0.157 | .2512843             | 1.249065 |
| _cons                   | .1906202   | .0758524  | -4.17 | 0.000 | .0873887             | .4157981 |

---

Note: \_cons estimates baseline risk.

. lrtest A  
df(unrestricted) = df(restricted) = 3  
r(498);

. glm Neurodevelopment2SDat3y CongZIKA Twins, fam(bin) link(log) nolog eform  
note: Twins != 0 predicts failure perfectly  
Twins dropped and 3 obs not used

Generalized linear models                      Number of obs =        59  
Optimization    : ML                            Residual df    =        60  
                                                 Scale parameter =        1  
Deviance        = 55.24601818                      (1/df) Deviance = .920767  
Pearson         = 59.51219511                     (1/df) Pearson = .9918699

Variance function: V(u) = u\*(1-u/1)            [Binomial]  
Link function    : g(u) = ln(u)                 [Log]

                                                 AIC        = .9403265  
Log likelihood = -27.15012226                      BIC            = -192.382

---

|                         | OIM         |           |       |       |                      |          |
|-------------------------|-------------|-----------|-------|-------|----------------------|----------|
| Neurodevelopment2SDat3y | Risk Ratio  | Std. Err. | z     | P> z  | [95% Conf. Interval] |          |
| CongZIKA                | 4.363636    | 1.82007   | 3.53  | 0.000 | 1.926695             | 9.882894 |
| Twins                   | 1 (omitted) |           |       |       |                      |          |
| _cons                   | .1458333    | .0509424  | -5.51 | 0.000 | .0735387             | .2891996 |

---

Note: \_cons estimates baseline risk.

```
. lrtest A
observations differ: 62 vs. 59
r(498);
```

```
. glm Neurodevelopment2SDat3y CongZIKA Modeofdelivery, fam(bin) link(log) nolog eform
--Break--
r(1);
```

```
. lrtest A
df(unrestricted) = df(restricted) = 3
r(498);
```

```
. tab Neurodevelopment2SDat3y CongZIKA Modeofdelivery
too many variables specified
r(103);
```

```
. tab Neurodevelopment2SDat3y CongZIKA if Modeofdeliver==1
```

| Neurodevelopment | CongZIKA |   | Total |
|------------------|----------|---|-------|
| <-2SD at         | 0        | 1 |       |
| 3y               |          |   |       |
| 0                | 6        | 0 | 6     |
| 1                | 1        | 1 | 2     |
| Total            | 7        | 1 | 8     |

```
. tab Neurodevelopment2SDat3y CongZIKA if Modeofdeliver==0
```

| Neurodevelopment | CongZIKA |    | Total |
|------------------|----------|----|-------|
| <-2SD at         | 0        | 1  |       |
| 3y               |          |    |       |
| 0                | 38       | 4  | 42    |
| 1                | 6        | 6  | 12    |
| Total            | 44       | 10 | 54    |

```
. do "C:\Users\lpomar\AppData\Local\Temp\STD3ed0_000000.tmp"
```

```
. glm Neurodevelopment2SDat3y CongZIKA Maternalinfectioninthe1sttr Prematurity, fam(bin) link(log) nolog
eform
--Break--
r(1);
```

```
end of do-file
```

```
--Break--
r(1);
```

```
. glm Neurodevelopment2SDat3y CongZIKA Prematurity, fam(bin) link(log) nolog eform
```

```
Generalized linear models          Number of obs =      62
```



Optimization : ML Residual df = 59  
 Scale parameter = 1  
 Deviance = 54.40961952 (1/df) Deviance = .9221969  
 Pearson = 61.99999999 (1/df) Pearson = 1.050847  
 Variance function: V(u) = u\*(1-u/1) [Binomial]  
 Link function : g(u) = ln(u) [Log]  
 AIC = .9743487  
 Log likelihood = -27.20480976 BIC = -189.0913

```
-----
```

|                 | OIM      |          | Std. Err. | z     | P> z     | [95% Conf. Interval] |  |
|-----------------|----------|----------|-----------|-------|----------|----------------------|--|
| CongZIKA        | 5.090909 | 2.264061 | 3.66      | 0.000 | 2.129334 | 12.17158             |  |
| Prematurity37wg | 2.666667 | 2.403701 | 1.09      | 0.277 | .4557283 | 15.60384             |  |
| _cons           | .125     | .0477352 | -5.45     | 0.000 | .059136  | .2642214             |  |

```
-----
```

Note: \_cons estimates baseline risk.

```
. do "C:\Users\lpomar\AppData\Local\Temp\STD3ed0_000000.tmp"
```

```
. lrtest A
df(unrestricted) = df(restricted) = 3
r(498);
```

end of do-file

```
r(498);
```

```
. do "C:\Users\lpomar\AppData\Local\Temp\STD3ed0_000000.tmp"
```

```
. * Sub-analysis
. tab Neurodevelopment2SDat3y CongZIKA if Structural==1, exact
```

| Neurodevelopment<br><-2SD at<br>3y | CongZIKA |   | Total |
|------------------------------------|----------|---|-------|
|                                    | 0        | 1 |       |
| 0                                  | 2        | 0 | 2     |
| 1                                  | 0        | 4 | 4     |
| Total                              | 2        | 4 | 6     |

Fisher's exact = 0.067  
 1-sided Fisher's exact = 0.067

```
. tab Neurodevelopment2SDat3y CongZIKA if Structural==0
```

| Neurodevelopment<br><-2SD at<br>3y | CongZIKA |   | Total |
|------------------------------------|----------|---|-------|
|                                    | 0        | 1 |       |
| 0                                  | 42       | 4 | 46    |

|                   |    |   |    |
|-------------------|----|---|----|
| 1                 | 7  | 3 | 10 |
| -----+-----+----- |    |   |    |
| Total             | 49 | 7 | 56 |

. glm Neurodevelopment2SDat3y CongZIKA if Structural==0, fam(bin) link(log) nolog eform

Generalized linear models                      Number of obs =        56  
Optimization    : ML                              Residual df    =        54  
                                                         Scale parameter =        1  
Deviance        = 49.75211266                      (1/df) Deviance = .9213354  
Pearson         =        56                              (1/df) Pearson = 1.037037

Variance function: V(u) = u\*(1-u/1)                      [Binomial]  
Link function    : g(u) = ln(u)                              [Log]

                                                         AIC            = .9598592  
Log likelihood = -24.87605633                              BIC            = -167.6169

|                         | OIM        |           |       |       |                      |          |
|-------------------------|------------|-----------|-------|-------|----------------------|----------|
| Neurodevelopment2SDat3y | Risk Ratio | Std. Err. | z     | P> z  | [95% Conf. Interval] |          |
| CongZIKA                | 3          | 1.678191  | 1.96  | 0.050 | 1.002216             | 8.980096 |
| _cons                   | .1428571   | .0499896  | -5.56 | 0.000 | .0719521             | .2836354 |

Note: \_cons estimates baseline risk.

. glm Neurodevelopment2SDat3y CongZIKA Maternalinfectioninthe1sttr if Structural==0, fam(bin) link(log) nolog eform

Generalized linear models                      Number of obs =        56  
Optimization    : ML                              Residual df    =        53  
                                                         Scale parameter =        1  
Deviance        = 49.68726937                      (1/df) Deviance = .9374956  
Pearson         = 55.37021041                              (1/df) Pearson = 1.044721

Variance function: V(u) = u\*(1-u/1)                      [Binomial]  
Link function    : g(u) = ln(u)                              [Log]

                                                         AIC            = .9944155  
Log likelihood = -24.84363469                              BIC            = -163.6564

|                             | OIM        |           |       |       |                      |          |
|-----------------------------|------------|-----------|-------|-------|----------------------|----------|
| Neurodevelopment2SDat3y     | Risk Ratio | Std. Err. | z     | P> z  | [95% Conf. Interval] |          |
| CongZIKA                    | 2.996958   | 1.673399  | 1.97  | 0.049 | 1.003226             | 8.952877 |
| Maternalinfectioninthe1sttr | 1.164735   | .6840908  | 0.26  | 0.795 | .3683713             | 3.682718 |
| _cons                       | .1368373   | .0537176  | -5.07 | 0.000 | .0633946             | .2953634 |

Note: \_cons estimates baseline risk.

. tab Motordomain CongZIKA, freq

|        |          |
|--------|----------|
| Motor  |          |
| domain | CongZIKA |

| <-2SD | 0  | 1  | Total |
|-------|----|----|-------|
| 0     | 50 | 9  | 59    |
| 1     | 1  | 2  | 3     |
| Total | 51 | 11 | 62    |

. glm Motordomain CongZIKA, fam(bin) link(log) nolog eform

Generalized linear models                      Number of obs =     62  
Optimization    : ML                              Residual df    =    60  
                                                         Scale parameter =     1  
Deviance        = 20.27497888                      (1/df) Deviance = .3379163  
Pearson         = 61.99998564                      (1/df) Pearson = 1.033333

Variance function: V(u) = u\*(1-u/1)                      [Binomial]  
Link function    : g(u) = ln(u)                              [Log]

                                                         AIC                = .3915319  
Log likelihood = -10.13748944                      BIC                = -227.3531

---

|                | OIM        |           |       |       |                      |          |
|----------------|------------|-----------|-------|-------|----------------------|----------|
| Motordomain2SD | Risk Ratio | Std. Err. | z     | P> z  | [95% Conf. Interval] |          |
| CongZIKA       | 9.272729   | 10.93035  | 1.89  | 0.059 | .9201159             | 93.44855 |
| _cons          | .0196078   | .0194147  | -3.97 | 0.000 | .0028159             | .1365353 |

---

Note: \_cons estimates baseline risk.

. glm Motordomain CongZIKA Maternalinfectioninthe1sttr, fam(bin) link(log) nolog eform

Generalized linear models                      Number of obs =     62  
Optimization    : ML                              Residual df    =    59  
                                                         Scale parameter =     1  
Deviance        = 18.30323253                      (1/df) Deviance = .3102243  
Pearson         = 112.0075866                      (1/df) Pearson = 1.898434

Variance function: V(u) = u\*(1-u/1)                      [Binomial]  
Link function    : g(u) = ln(u)                              [Log]

                                                         AIC                = .3919876  
Log likelihood = -9.151616264                      BIC                = -225.1977

---

|                             | OIM        |           |       |       |                      |          |
|-----------------------------|------------|-----------|-------|-------|----------------------|----------|
| Motordomain2SD              | Risk Ratio | Std. Err. | z     | P> z  | [95% Conf. Interval] |          |
| CongZIKA                    | 9.344466   | 10.71218  | 1.95  | 0.051 | .9880204             | 88.37778 |
| Maternalinfectioninthe1sttr | 4.573782   | 5.188736  | 1.34  | 0.180 | .4950261             | 42.25935 |
| _cons                       | .0093458   | .0116673  | -3.74 | 0.000 | .000809              | .1079583 |

---

Note: \_cons estimates baseline risk.

. tab Congitive CongZIKA, freq

| Congitive domain <-2SD | CongZIKA |    | Total |
|------------------------|----------|----|-------|
|                        | 0        | 1  |       |
| 0                      | 48       | 5  | 53    |
| 1                      | 3        | 6  | 9     |
| Total                  | 51       | 11 | 62    |

. glm Congitive CongZIKA, fam(bin) link(log) nolog eform

Generalized linear models                      Number of obs =        62  
Optimization    : ML                            Residual df    =       60  
                                                  Scale parameter =        1  
Deviance        = 37.97744701                    (1/df) Deviance = .6329575  
Pearson         = 61.99999999                    (1/df) Pearson = 1.033333  
Variance function: V(u) = u\*(1-u/1)            [Binomial]  
Link function    : g(u) = ln(u)                [Log]  
                                                  AIC                = .6770556  
Log likelihood = -18.9887235                    BIC                = -209.6506

|                  | OIM        |           |       |       |                      |          |
|------------------|------------|-----------|-------|-------|----------------------|----------|
| Congivedomain2SD | Risk Ratio | Std. Err. | z     | P> z  | [95% Conf. Interval] |          |
| CongZIKA         | 9.272727   | 5.786977  | 3.57  | 0.000 | 2.728882             | 31.50868 |
| _cons            | .0588235   | .0329478  | -5.06 | 0.000 | .0196238             | .1763272 |

Note: \_cons estimates baseline risk.

. glm Congitive CongZIKA Maternalinfectioninthe1sttr, fam(bin) link(log) nolog eform

Generalized linear models                      Number of obs =        62  
Optimization    : ML                            Residual df    =       59  
                                                  Scale parameter =        1  
Deviance        = 35.61810621                    (1/df) Deviance = .6036967  
Pearson         = 55.36963588                    (1/df) Pearson = .9384684  
Variance function: V(u) = u\*(1-u/1)            [Binomial]  
Link function    : g(u) = ln(u)                [Log]  
                                                  AIC                = .6712598  
Log likelihood = -17.8090531                    BIC                = -207.8828

|                             | OIM        |           |       |       |                      |          |
|-----------------------------|------------|-----------|-------|-------|----------------------|----------|
| Congivedomain2SD            | Risk Ratio | Std. Err. | z     | P> z  | [95% Conf. Interval] |          |
| CongZIKA                    | 8.286445   | 5.18194   | 3.38  | 0.001 | 2.432586             | 28.22724 |
| Maternalinfectioninthe1sttr | 2.114485   | 1.074745  | 1.47  | 0.141 | .7808331             | 5.725995 |
| _cons                       | .0447738   | .0271193  | -5.13 | 0.000 | .0136602             | .146755  |

Note: \_cons estimates baseline risk.

.

```
. tab Socioaffectivedomain2SD CongZIKA, freq
```

| Socio-af-<br>ctive  <br>domain | CongZIKA |    | Total |
|--------------------------------|----------|----|-------|
| <-2SD                          | 0        | 1  |       |
| 0                              | 45       | 7  | 52    |
| 1                              | 6        | 4  | 10    |
| Total                          | 51       | 11 | 62    |

```
. glm Socioaffectivedomain2SD CongZIKA, fam(bin) link(log) nolog eform
```

```
Generalized linear models          Number of obs =    62
Optimization   : ML                Residual df   =    60
                                   Scale parameter =     1
Deviance       = 51.36607585        (1/df) Deviance = .8561013
Pearson        =    62              (1/df) Pearson = 1.033333

Variance function: V(u) = u*(1-u/1) [Binomial]
Link function   : g(u) = ln(u)      [Log]

                                   AIC      = .8930012
Log likelihood = -25.68303793        BIC      = -196.262
```

```
-----+-----
```

|                         | OIM        |           |       |       |                      |          |
|-------------------------|------------|-----------|-------|-------|----------------------|----------|
| Socioaffectivedomain2SD | Risk Ratio | Std. Err. | z     | P> z  | [95% Conf. Interval] |          |
| CongZIKA                | 3.090909   | 1.710225  | 2.04  | 0.041 | 1.044984             | 9.142455 |
| _cons                   | .1176471   | .0451156  | -5.58 | 0.000 | .055483              | .2494606 |

```
-----+-----
```

Note: \_cons estimates baseline risk.

```
. glm Socioaffectivedomain2SD CongZIKA Maternalinfectioninthe1sttr, fam(bin) link(log) nolog eform
```

```
Generalized linear models          Number of obs =    62
Optimization   : ML                Residual df   =    59
                                   Scale parameter =     1
Deviance       = 48.7697619        (1/df) Deviance = .8266061
Pearson        = 67.94200592        (1/df) Pearson = 1.151559

Variance function: V(u) = u*(1-u/1) [Binomial]
Link function   : g(u) = ln(u)      [Log]

                                   AIC      = .8833833
Log likelihood = -24.38488095        BIC      = -194.7312
```

```
-----+-----
```

|                             | OIM        |           |       |       |                      |          |
|-----------------------------|------------|-----------|-------|-------|----------------------|----------|
| Socioaffectivedomain2SD     | Risk Ratio | Std. Err. | z     | P> z  | [95% Conf. Interval] |          |
| CongZIKA                    | 3.28655    | 1.698334  | 2.30  | 0.021 | 1.193656             | 9.049011 |
| Maternalinfectioninthe1sttr | 2.424121   | 1.27574   | 1.68  | 0.092 | .8641584             | 6.800101 |
| _cons                       | .0810377   | .0388727  | -5.24 | 0.000 | .0316502             | .2074902 |

```
-----+-----
```

Note: \_cons estimates baseline risk.

```
. tab Neurodevelopment2SDat3y CongZIKA if Maternalinfectioninthe1sttr==1
```

| Neurodevelopment<br><-2SD at<br>3y | CongZIKA |   | Total |
|------------------------------------|----------|---|-------|
|                                    | 0        | 1 |       |
| 0                                  | 12       | 1 | 13    |
| 1                                  | 3        | 3 | 6     |
| Total                              | 15       | 4 | 19    |

```
. tab Neurodevelopment2SDat3y CongZIKA if Maternalinfectioninthe1sttr==0
```

| Neurodevelopment<br><-2SD at<br>3y | CongZIKA |   | Total |
|------------------------------------|----------|---|-------|
|                                    | 0        | 1 |       |
| 0                                  | 32       | 3 | 35    |
| 1                                  | 4        | 4 | 8     |
| Total                              | 36       | 7 | 43    |

```
. cs Neurodevelopment2SDat3y CongZIKA, by(Maternalinfectioninthe1sttr)
```

| Maternal infecti | RR       | [95% Conf. Interval] | M-H Weight |
|------------------|----------|----------------------|------------|
| 0                | 5.142857 | 1.669925 15.83842    | .6511628   |
| 1                | 3.75     | 1.176125 11.95663    | .6315789   |
| Crude            | 4.636364 | 2.041238 10.5308     |            |
| M-H combined     | 4.457061 | 1.989707 9.984078    |            |

Test of homogeneity (M-H)  $\chi^2(1) = 0.147$   $Pr > \chi^2 = 0.7010$

.

```
. log close
```

name: <unnamed>

log: \\HOME\lpomar\Mes Documents\Zika\_enfants-Guyane\Nature\R1\Dataset\Table2.log

log type: text

closed on: 23 Mar 2021, 17:55:04

-----

-----

```
-----  
-----  
name: <unnamed>  
log: \\HOME\lpomar\Mes Documents\Zika_enfants-Guyane\Nature\R1\Dataset\Tables3-4.log  
log type: text  
opened on: 24 Mar 2021, 20:51:56  
  
. import excel "\\HOME\lpomar\Mes Documents\Zika_enfants-Guyane\Nature\R1\Dataset\Source Data.xlsx",  
sheet("Tables 3 & 4") firstrow  
(44 vars, 140 obs)  
  
.   
. destring CongZIKA HCatbirthcm HCat1mcm HCat2mcm HCat1ycm HCat2ycm HCat3ycm Birthweightg  
Weightat1mkg Weightat2mKg Weightat1ykg Weightat2yKg Weightat3yKg Structuralbrainanomal  
> ies Corticaldevelopmentanomaly Corpuscallosumanomaly Calcificationsorcysticlesions Posteriorfossaanomaly  
Ventriculomegaly Microphtalmy AbnormalOAE Neurologicalsymptomsat2m Ar  
> throgyriposis Hypertonia Dysphagiaswallowingdisorders Seizures Neurologicimpairmentsat2y Cerebralpalsyat2y  
Severedystoniaortremors Seizuresat2y Delayinmotoracquisitions Ageats  
> ittingpositionm Ageatwalkingm Neurosensoryalterations Impairedresponsetovisualstim  
Impairedresponsetoauditoryst Neurodevelopment2SDat3y Motordomain2SD Congitivedomain2SD Soci  
> ooaffectivedomain2SD, replace  
CongZIKA: all characters numeric; replaced as byte  
(11 missing values generated)  
HCatbirthcm already numeric; no replace  
HCat1mcm: all characters numeric; replaced as double  
(12 missing values generated)  
HCat2mcm: all characters numeric; replaced as byte  
(12 missing values generated)  
HCat1ycm: all characters numeric; replaced as double  
(28 missing values generated)  
HCat2ycm: all characters numeric; replaced as double  
(30 missing values generated)  
HCat3ycm: all characters numeric; replaced as double  
(78 missing values generated)  
Birthweightg already numeric; no replace  
Weightat1mkg: all characters numeric; replaced as double  
(6 missing values generated)  
Weightat2mKg: all characters numeric; replaced as double  
(7 missing values generated)  
Weightat1ykg: all characters numeric; replaced as double  
(22 missing values generated)  
Weightat2yKg: all characters numeric; replaced as double  
(25 missing values generated)  
Weightat3yKg: all characters numeric; replaced as double  
(72 missing values generated)  
Structuralbrainanomalies: all characters numeric; replaced as byte  
(11 missing values generated)  
Corticaldevelopmentanomaly: all characters numeric; replaced as byte  
(11 missing values generated)  
Corpuscallosumanomaly: all characters numeric; replaced as byte  
(11 missing values generated)  
Calcificationsorcysticlesions: all characters numeric; replaced as byte  
(11 missing values generated)  
Posteriorfossaanomaly: all characters numeric; replaced as byte  
(11 missing values generated)  
Ventriculomegaly: all characters numeric; replaced as byte  
(11 missing values generated)
```

Microphthalmia: all characters numeric; replaced as byte  
 (11 missing values generated)  
 AbnormalOAE: all characters numeric; replaced as byte  
 (85 missing values generated)  
 Neurologicalsymptomsat2m: all characters numeric; replaced as byte  
 (11 missing values generated)  
 Arthrogryposis: all characters numeric; replaced as byte  
 (11 missing values generated)  
 Hypertonia: all characters numeric; replaced as byte  
 (11 missing values generated)  
 Dysphagiaswallowingdisorders: all characters numeric; replaced as byte  
 (11 missing values generated)  
 Seizures: all characters numeric; replaced as byte  
 (11 missing values generated)  
 Neurologicimpairmentsat2y: all characters numeric; replaced as byte  
 (29 missing values generated)  
 Cerebralpalsyat2y: all characters numeric; replaced as byte  
 (29 missing values generated)  
 Severedystoniaortremors: all characters numeric; replaced as byte  
 (29 missing values generated)  
 Seizuresat2y: all characters numeric; replaced as byte  
 (29 missing values generated)  
 Delayinmotoracquisitions: all characters numeric; replaced as byte  
 (27 missing values generated)  
 Ageatsittingpositionm: all characters numeric; replaced as double  
 (28 missing values generated)  
 Ageatwalkingm: all characters numeric; replaced as double  
 (29 missing values generated)  
 Neurosensoryalterations: all characters numeric; replaced as byte  
 (29 missing values generated)  
 Impairedresponsetovisualstim: all characters numeric; replaced as byte  
 (27 missing values generated)  
 Impairedresponsetoauditoryst: all characters numeric; replaced as byte  
 (27 missing values generated)  
 Neurodevelopment2SDat3y: all characters numeric; replaced as byte  
 (78 missing values generated)  
 Motordomain2SD: all characters numeric; replaced as byte  
 (78 missing values generated)  
 Congitivedomain2SD: all characters numeric; replaced as byte  
 (78 missing values generated)  
 Socioaffectivedomain2SD: all characters numeric; replaced as byte  
 (78 missing values generated)

.  
 . \* Neonatal demise & NICU admission:  
 . tab Neonataldemise CongZIKA, exact

| Neonatal<br>demise | CongZIKA |    | Total |
|--------------------|----------|----|-------|
|                    | 0        | 1  |       |
| 0                  | 111      | 17 | 128   |
| 1                  | 0        | 1  | 1     |
| Total              | 111      | 18 | 129   |

Fisher's exact = 0.140  
 1-sided Fisher's exact = 0.140



```
. tab NICU CongZIKA, chi2
```

| NICU  <br>admission | CongZIKA |    | Total |
|---------------------|----------|----|-------|
|                     | 0        | 1  |       |
| 0                   | 97       | 15 | 112   |
| 1                   | 14       | 3  | 17    |
| Total               | 111      | 18 | 129   |

Pearson chi2(1) = 0.2225 Pr = 0.637

```
. * HC:  
. codebook HCatbirth if CongZIKA==1
```

```
-----  
-----  
HCatbirthcm  
birth (cm) HC at  
-----  
-----
```

type: numeric (double)

range: [27.5,35.5]            units: .1  
unique values: 10            missing .: 0/18

mean: 32.5556  
std. dev: 1.84621

percentiles:    10%    25%    50%    75%    90%  
                 31    31.5    32.75    34    35

```
. codebook HCatbirth if CongZIKA==0
```

```
-----  
-----  
HCatbirthcm  
birth (cm) HC at  
-----  
-----
```

type: numeric (double)

range: [29,38]            units: .1  
unique values: 14            missing .: 0/111

mean: 33.3784  
std. dev: 1.70056

percentiles:    10%    25%    50%    75%    90%  
                 31    32.5    33    34.5    35.5

```
. ranksum HCatbirth, by(CongZIKA)
```

Two-sample Wilcoxon rank-sum (Mann-Whitney) test

| CongZIKA | obs | rank sum | expected |
|----------|-----|----------|----------|
| 0        | 111 | 7471     | 7215     |
| 1        | 18  | 914      | 1170     |
| combined | 129 | 8385     | 8385     |

unadjusted variance 21645.00

adjustment for ties -529.81

adjusted variance 21115.19

Ho: HCatbi~m(CongZIKA==0) = HCatbi~m(CongZIKA==1)

z = 1.762

Prob > |z| = 0.0781

Exact Prob = 0.0784

. codebook HCat1m if CongZIKA==1

-----  
 HCat1mcm HC at  
 1m (cm)  
 -----

type: numeric (double)

range: [31,39]                      units: 1  
 unique values: 8                    missing .: 1/18

tabulation: Freq. Value  
 1 31  
 2 33  
 1 34  
 1 35  
 3 36  
 4 37  
 4 38  
 1 39  
 1 .

. codebook HCat1m if CongZIKA==0

-----  
 HCat1mcm HC at  
 1m (cm)  
 -----

type: numeric (double)

range: [33,40]                      units: .1  
 unique values: 11                   missing .: 0/111

mean: 36.536  
std. dev: 1.60922

percentiles: 10% 25% 50% 75% 90%  
34 36 37 38 39

. ranksum HCat1m, by(CongZIKA)

Two-sample Wilcoxon rank-sum (Mann-Whitney) test

| CongZIKA | obs | rank sum | expected |
|----------|-----|----------|----------|
| 0        | 111 | 7226     | 7159.5   |
| 1        | 17  | 1030     | 1096.5   |
| combined | 128 | 8256     | 8256     |

unadjusted variance 20285.25  
adjustment for ties -639.72

adjusted variance 19645.53

Ho: HCat1mcm(CongZIKA==0) = HCat1mcm(CongZIKA==1)

z = 0.474

Prob > |z| = 0.6352

Exact Prob = 0.6391

. codebook HCat1ycm if CongZIKA==1

-----  
-----  
HCat1ycm HC at 1y  
(cm)  
-----  
-----

type: numeric (double)

range: [37,47] units: 1  
unique values: 8 missing : 3/18

tabulation: Freq. Value  
1 37  
1 41  
1 42  
4 43  
4 44  
2 45  
1 46  
1 47  
3 .

. codebook HCat1ycm if CongZIKA==0

-----  
-----

HCat1ycm  
(cm)

HC at 1y

type: numeric (double)

range: [41,50]                    units: .1  
unique values: 11                missing .: 14/111

mean: 45.5722  
std. dev: 2.19729

percentiles:    10%    25%    50%    75%    90%  
                  42     44     46     47     48

. ranksum HCat1ycm, by(CongZIKA)

Two-sample Wilcoxon rank-sum (Mann-Whitney) test

| CongZIKA | obs | rank sum | expected |
|----------|-----|----------|----------|
| 0        | 97  | 5851.5   | 5480.5   |
| 1        | 15  | 476.5    | 847.5    |
| combined | 112 | 6328     | 6328     |

unadjusted variance 13701.25  
adjustment for ties -244.67

adjusted variance 13456.58

Ho: HCat1ycm(CongZIKA==0) = HCat1ycm(CongZIKA==1)

z = 3.198

Prob > |z| = 0.0014

Exact Prob = 0.0010

. codebook HCat2ycm if CongZIKA==1

HCat2ycm  
(cm)

HC at 2y

type: numeric (double)

range: [38,50]                    units: 1  
unique values: 8                missing .: 3/18

tabulation: Freq. Value  
              1 38  
              1 44  
              2 45  
              4 46

```

1 47
3 48
2 49
1 50
3 .

```

```
. codebook HCat2ycm if CongZIKA==0
```

```
-----
-----
HCat2ycm                                     HC at 2y
(cm)
-----
-----
```

```
type: numeric (double)
```

```
range: [44,53]          units: .1
unique values: 11      missing :: 16/111
```

```
mean: 48.4053
std. dev: 2.14537
```

```
percentiles:   10%   25%   50%   75%   90%
               45    47    48    50    51
```

```
. ranksum HCat2ycm, by(CongZIKA)
```

Two-sample Wilcoxon rank-sum (Mann-Whitney) test

| CongZIKA | obs | rank sum | expected |
|----------|-----|----------|----------|
| 0        | 95  | 5585     | 5272.5   |
| 1        | 15  | 520      | 832.5    |
| combined | 110 | 6105     | 6105     |

```
unadjusted variance 13181.25
adjustment for ties -242.39
-----
adjusted variance 12938.86
```

```
Ho: HCat2ycm(CongZIKA==0) = HCat2ycm(CongZIKA==1)
z = 2.747
Prob > |z| = 0.0060
Exact Prob = 0.0053
```

```
. codebook HCat3ycm if CongZIKA==1
```

```
-----
-----
HCat3ycm                                     HC at 3y
(cm)
-----
-----
```



-----  
-----  
Birthweightg  
Birthweight (g)  
-----  
-----

type: numeric (double)

range: [1910,3310]                    units: 1  
unique values: 17                    missing .: 0/18

mean: 2791.61  
std. dev: 353.75

percentiles:    10%    25%    50%    75%    90%  
                 2160    2675    2905    2970    3190

. codebook Birthweightg if CongZIKA==0

-----  
-----  
Birthweightg  
Birthweight (g)  
-----  
-----

type: numeric (double)

range: [1930,4620]                    units: 1  
unique values: 98                    missing .: 0/111

mean: 3144.13  
std. dev: 490.859

percentiles:    10%    25%    50%    75%    90%  
                 2455    2755    3185    3495    3665

. ranksum Birthweightg, by(CongZIKA)

Two-sample Wilcoxon rank-sum (Mann-Whitney) test

| CongZIKA | obs | rank sum | expected |
|----------|-----|----------|----------|
| 0        | 111 | 7649.5   | 7215     |
| 1        | 18  | 735.5    | 1170     |
| combined | 129 | 8385     | 8385     |

unadjusted variance    21645.00  
adjustment for ties    -1.15

-----  
adjusted variance    21643.85

Ho: Birthw~g(CongZIKA==0) = Birthw~g(CongZIKA==1)

z = 2.953

Prob > |z| = 0.0031

Exact Prob = 0.0027

. codebook Weightat1mkg if CongZIKA==1

-----  
-----  
Weightat1mkg Weight at  
1m (kg)  
-----  
-----

type: numeric (double)

range: [3,4.1]                    units: .1  
unique values: 9                    missing .: 1/18

tabulation: Freq. Value  
1 3  
1 3.2  
1 3.4  
2 3.5  
3 3.7  
5 3.8  
2 3.9  
1 4  
1 4.1  
1 .

. codebook Weightat1mkg if CongZIKA==0

-----  
-----  
Weightat1mkg Weight at  
1m (kg)  
-----  
-----

type: numeric (double)

range: [2.4,5.4]                    units: .01  
unique values: 28                    missing .: 0/111

mean: 4.05315  
std. dev: .549577

percentiles:    10%    25%    50%    75%    90%  
                 3.4    3.7    4.2    4.4    4.7

. ranksum Weightat1mkg, by(CongZIKA)

Two-sample Wilcoxon rank-sum (Mann-Whitney) test

| CongZIKA | obs | rank sum | expected |
|----------|-----|----------|----------|
| 0        | 111 | 7613     | 7159.5   |
| 1        | 17  | 643      | 1096.5   |



-----+-----  
combined | 128 8256 8256

unadjusted variance 20285.25  
adjustment for ties -95.07  
-----  
adjusted variance 20190.18

Ho: Weig~mkg(CongZIKA==0) = Weig~mkg(CongZIKA==1)  
z = 3.192  
Prob > |z| = 0.0014  
Exact Prob = 0.0011

. codebook Weightat2m if CongZIKA==1

-----  
Weightat2mKg Weight at  
2m (Kg)  
-----

type: numeric (double)

range: [4,6.2] units: .1  
unique values: 10 missing :: 1/18

mean: 4.85294  
std. dev: .458418

percentiles: 10% 25% 50% 75% 90%  
4.4 4.6 4.8 5 5.3

. codebook Weightat2m if CongZIKA==0

-----  
Weightat2mKg Weight at  
2m (Kg)  
-----

type: numeric (double)

range: [3.5,6.5] units: .1  
unique values: 25 missing :: 1/111

mean: 5.18455  
std. dev: .670641

percentiles: 10% 25% 50% 75% 90%  
4.2 4.7 5.2 5.7 6

. ranksum Weightat2m, by(CongZIKA)

Two-sample Wilcoxon rank-sum (Mann-Whitney) test

| CongZIKA | obs | rank sum | expected |
|----------|-----|----------|----------|
| 0        | 110 | 7362.5   | 7040     |
| 1        | 17  | 765.5    | 1088     |
| combined | 127 | 8128     | 8128     |

unadjusted variance 19946.67

adjustment for ties -58.55

adjusted variance 19888.12

Ho: Weig~mKg(CongZIKA==0) = Weig~mKg(CongZIKA==1)

z = 2.287

Prob > |z| = 0.0222

Exact Prob = 0.0214

. codebook Weightat1y if CongZIKA==1

-----  
 Weightat1ykg Weight at  
 1y (kg)  
 -----

type: numeric (double)

range: [6,11.3]                    units: .1  
 unique values: 13                missing : 3/18

mean: 9.63333  
 std. dev: 1.37616

percentiles:    10%    25%    50%    75%    90%  
                   8    8.9    10    10.7    11.2

. codebook Weightat1y if CongZIKA==0

-----  
 Weightat1ykg Weight at  
 1y (kg)  
 -----

type: numeric (double)

range: [6.4,13.3]                    units: .1  
 unique values: 45                missing : 14/111

mean: 10.0299  
 std. dev: 1.34507

percentiles:    10%    25%    50%    75%    90%  
                   8.3    8.9    10.1    10.9    11.8

```
. ranksum Weightat1y, by(CongZIKA)
```

Two-sample Wilcoxon rank-sum (Mann-Whitney) test

| CongZIKA | obs | rank sum | expected |
|----------|-----|----------|----------|
| 0        | 97  | 5558     | 5480.5   |
| 1        | 15  | 770      | 847.5    |
| combined | 112 | 6328     | 6328     |

unadjusted variance 13701.25

adjustment for ties -12.00

adjusted variance 13689.25

Ho: Weig~ykg(CongZIKA==0) = Weig~ykg(CongZIKA==1)

z = 0.662

Prob > |z| = 0.5077

Exact Prob = 0.5128

```
. codebook Weightat2y if CongZIKA==1
```

Weightat2yKg  
2y (Kg)

Weight at

type: numeric (double)

range: [9.6,13.9]      units: .1  
unique values: 15      missing .: 3/18

mean: 12.1333  
std. dev: 1.25338

percentiles:    10%    25%    50%    75%    90%  
              9.8    11.5    12.3    13.1    13.8

```
. codebook Weightat2y if CongZIKA==0
```

Weightat2yKg  
2y (Kg)

Weight at

type: numeric (double)

range: [9.4,15]      units: .1  
unique values: 42      missing .: 17/111

mean: 12.3851

std. dev: 1.22246

|              |      |      |      |      |     |
|--------------|------|------|------|------|-----|
| percentiles: | 10%  | 25%  | 50%  | 75%  | 90% |
|              | 10.8 | 11.6 | 12.4 | 13.2 | 14  |

. ranksum Weightat2y, by(CongZIKA)

Two-sample Wilcoxon rank-sum (Mann-Whitney) test

| CongZIKA | obs | rank sum | expected |
|----------|-----|----------|----------|
| 0        | 94  | 5223.5   | 5170     |
| 1        | 15  | 771.5    | 825      |
| combined | 109 | 5995     | 5995     |

unadjusted variance 12925.00

adjustment for ties -14.61

adjusted variance 12910.39

Ho:  $Wei \sim 2yKg(CongZIKA==0) = Wei \sim 2yKg(CongZIKA==1)$

z = 0.471

Prob > |z| = 0.6377

Exact Prob = 0.6425

. codebook Weightat3y if CongZIKA==1

---

Weightat3yKg Weight at  
3y (Kg)

---

type: numeric (double)

range: [11.4,20]

units: .1

unique values: 11

missing :: 6/18

mean: 15.15

std. dev: 2.15259

|              |      |      |      |       |      |
|--------------|------|------|------|-------|------|
| percentiles: | 10%  | 25%  | 50%  | 75%   | 90%  |
|              | 13.9 | 14.2 | 14.6 | 16.05 | 17.5 |

. codebook Weightat3y if CongZIKA==0

---

Weightat3yKg Weight at  
3y (Kg)

---

type: numeric (double)

range: [12,19.4]                      units: .1  
 unique values: 35                      missing .: 61/111

mean: 14.826  
 std. dev: 1.54521

percentiles:    10%    25%    50%    75%    90%  
                   12.9    13.8    14.7    15.8    16.85

. ranksum Weightat3y, by(CongZIKA)

Two-sample Wilcoxon rank-sum (Mann-Whitney) test

| CongZIKA | obs | rank sum | expected |
|----------|-----|----------|----------|
| 0        | 50  | 1547.5   | 1575     |
| 1        | 12  | 405.5    | 378      |
| combined | 62  | 1953     | 1953     |

unadjusted variance    3150.00  
 adjustment for ties    -4.20

-----  
 adjusted variance      3145.80

Ho: Wei~3yKg(CongZIKA==0) = Wei~3yKg(CongZIKA==1)  
 z = -0.490  
 Prob > |z| = 0.6239  
 Exact Prob = 0.6313

. \* Structural brain anomalies:  
 . tab Structuralbrainanomalies CongZIKA, chi2

| Structural brain anomalies | CongZIKA |    | Total |
|----------------------------|----------|----|-------|
|                            | 0        | 1  |       |
| 0                          | 108      | 12 | 120   |
| 1                          | 3        | 6  | 9     |
| Total                      | 111      | 18 | 129   |

Pearson chi2(1) = 22.3910 Pr = 0.000

. tab Cortical CongZIKA, exact

| Cortical development anomaly | CongZIKA |    | Total |
|------------------------------|----------|----|-------|
|                              | 0        | 1  |       |
| 0                            | 111      | 14 | 125   |
| 1                            | 0        | 4  | 4     |
| Total                        | 111      | 18 | 129   |

Fisher's exact = 0.000

1-sided Fisher's exact = 0.000

. tab Corpuscall CongZIKA, exact

| Corpus  <br>callosum  <br>anomaly | CongZIKA |    | Total |
|-----------------------------------|----------|----|-------|
|                                   | 0        | 1  |       |
| 0                                 | 109      | 14 | 123   |
| 1                                 | 2        | 4  | 6     |
| Total                             | 111      | 18 | 129   |

Fisher's exact = 0.003

1-sided Fisher's exact = 0.003

. tab Calcifications CongZIKA, exact

| Calcificat  <br>ions or  <br>cystic  <br>lesions | CongZIKA |    | Total |
|--------------------------------------------------|----------|----|-------|
|                                                  | 0        | 1  |       |
| 0                                                | 110      | 13 | 123   |
| 1                                                | 1        | 5  | 6     |
| Total                                            | 111      | 18 | 129   |

Fisher's exact = 0.000

1-sided Fisher's exact = 0.000

. tab Posteriorfossa CongZIKA, exact

| Posterior  <br>fossa  <br>anomaly | CongZIKA |    | Total |
|-----------------------------------|----------|----|-------|
|                                   | 0        | 1  |       |
| 0                                 | 111      | 14 | 125   |
| 1                                 | 0        | 4  | 4     |
| Total                             | 111      | 18 | 129   |

Fisher's exact = 0.000

1-sided Fisher's exact = 0.000

. tab Ventriculomegaly CongZIKA, exact

| Ventriculo  <br>megaly | CongZIKA |    | Total |
|------------------------|----------|----|-------|
|                        | 0        | 1  |       |
| 0                      | 110      | 14 | 124   |
| 1                      | 1        | 4  | 5     |
| Total                  | 111      | 18 | 129   |

Fisher's exact = 0.001

1-sided Fisher's exact = 0.001

. \* Ocular anomalies  
 . tab Microphthalmia CongZIKA, exact

| Microphthalmia | CongZIKA |    | Total |
|----------------|----------|----|-------|
|                | 0        | 1  |       |
| 0              | 111      | 17 | 128   |
| 1              | 0        | 1  | 1     |
| Total          | 111      | 18 | 129   |

Fisher's exact = 0.140  
 1-sided Fisher's exact = 0.140

. tab Fundoscopy CongZIKA, exact

Enumerating sample-space combinations:

stage 5: enumerations = 1  
 stage 4: enumerations = 2  
 stage 3: enumerations = 5  
 stage 2: enumerations = 7  
 stage 1: enumerations = 0

| Fundoscopy             | CongZIKA |    | Total |
|------------------------|----------|----|-------|
|                        | 0        | 1  |       |
| .                      | 75       | 9  | 84    |
| 0                      | 34       | 6  | 40    |
| Macula atrophy, cho..  | 1        | 1  | 2     |
| Subretinal hemorrhage  | 1        | 1  | 2     |
| Subretinal hemorrhha.. | 0        | 1  | 1     |
| Total                  | 111      | 18 | 129   |

Fisher's exact = 0.033

. cci 3 2 8 32

|                                 | Exposed        | Unexposed | Total                | Proportion Exposed |
|---------------------------------|----------------|-----------|----------------------|--------------------|
| Cases                           | 3              | 2         | 5                    | 0.6000             |
| Controls                        | 8              | 32        | 40                   | 0.2000             |
| Total                           | 11             | 34        | 45                   | 0.2444             |
|                                 | Point estimate |           | [95% Conf. Interval] |                    |
| Odds ratio                      | 6              |           | .5561587             | 79.06791 (exact)   |
| Attr. frac. ex.                 | .8333333       |           | -.7980481            | .9873526 (exact)   |
| Attr. frac. pop                 | .5             |           |                      |                    |
| -----                           |                |           |                      |                    |
| chi2(1) = 3.85 Pr>chi2 = 0.0497 |                |           |                      |                    |

. cci 2 1 8 33

|  | Exposed | Unexposed | Total | Proportion Exposed |
|--|---------|-----------|-------|--------------------|
|--|---------|-----------|-------|--------------------|

| Cases           | 2              | 1  | 3                    | 0.6667           |
|-----------------|----------------|----|----------------------|------------------|
| Controls        | 8              | 33 | 41                   | 0.1951           |
| Total           | 10             | 34 | 44                   | 0.2273           |
|                 | Point estimate |    | [95% Conf. Interval] |                  |
| Odds ratio      | 8.25           |    | .3613468             | 500.877 (exact)  |
| Attr. frac. ex. | .8787879       |    | -1.767424            | .9980035 (exact) |
| Attr. frac. pop | .5858586       |    |                      |                  |

chi2(1) = 3.54 Pr>chi2 = 0.0599

. cci 1 1 9 33

|                 | Exposed        | Unexposed | Total                | Exposed          |
|-----------------|----------------|-----------|----------------------|------------------|
| Cases           | 1              | 1         | 2                    | 0.5000           |
| Controls        | 9              | 33        | 42                   | 0.2143           |
| Total           | 10             | 34        | 44                   | 0.2273           |
|                 | Point estimate |           | [95% Conf. Interval] |                  |
| Odds ratio      | 3.666667       |           | .0420734             | 296.3017 (exact) |
| Attr. frac. ex. | .7272727       |           | -22.76798            | .9966251 (exact) |
| Attr. frac. pop | .3636364       |           |                      |                  |

chi2(1) = 0.89 Pr>chi2 = 0.3462

\* OAE  
 . tab AbnormalOAE CongZIKA, exact

| Abnormal OAE | CongZIKA |    | Total |
|--------------|----------|----|-------|
|              | 0        | 1  |       |
| 0            | 42       | 10 | 52    |
| 1            | 1        | 2  | 3     |
| Total        | 43       | 12 | 55    |

Fisher's exact = 0.117  
 1-sided Fisher's exact = 0.117

\* Severe neurological symptoms:  
 . tab Neurologicalsymptomsat2m CongZIKA, exact

| Neurological symptoms at 2m | CongZIKA |    | Total |
|-----------------------------|----------|----|-------|
|                             | 0        | 1  |       |
| 0                           | 110      | 13 | 123   |
| 1                           | 1        | 5  | 6     |



|       |     |    |     |
|-------|-----|----|-----|
| Total | 111 | 18 | 129 |
|-------|-----|----|-----|

Fisher's exact = 0.000  
 1-sided Fisher's exact = 0.000

. tab Arthrogryposis CongZIKA, exact

| Arthrogryposis | CongZIKA |    | Total |
|----------------|----------|----|-------|
|                | 0        | 1  |       |
| 0              | 111      | 17 | 128   |
| 1              | 0        | 1  | 1     |
| Total          | 111      | 18 | 129   |

Fisher's exact = 0.140  
 1-sided Fisher's exact = 0.140

. tab Hypertonia CongZIKA, exact

| Hypertonia | CongZIKA |    | Total |
|------------|----------|----|-------|
|            | 0        | 1  |       |
| 0          | 111      | 15 | 126   |
| 1          | 0        | 3  | 3     |
| Total      | 111      | 18 | 129   |

Fisher's exact = 0.002  
 1-sided Fisher's exact = 0.002

. tab Dysphagiaswallowingdisorders CongZIKA, exact

| Dysphagia<br>/<br>swallowing<br>disorders | CongZIKA |    | Total |
|-------------------------------------------|----------|----|-------|
|                                           | 0        | 1  |       |
| 0                                         | 111      | 16 | 127   |
| 1                                         | 0        | 2  | 2     |
| Total                                     | 111      | 18 | 129   |

Fisher's exact = 0.019  
 1-sided Fisher's exact = 0.019

. tab Seizures CongZIKA, exact

| Seizures | CongZIKA |    | Total |
|----------|----------|----|-------|
|          | 0        | 1  |       |
| 0        | 110      | 17 | 127   |
| 1        | 1        | 1  | 2     |
| Total    | 111      | 18 | 129   |

Fisher's exact = 0.261  
 1-sided Fisher's exact = 0.261

. tab Calcifications CongZIKA, exact

| Calcifications or lesions | CongZIKA |    | Total |
|---------------------------|----------|----|-------|
|                           | 0        | 1  |       |
| 0                         | 110      | 13 | 123   |
| 1                         | 1        | 5  | 6     |
| Total                     | 111      | 18 | 129   |

Fisher's exact = 0.000  
 1-sided Fisher's exact = 0.000

. tab Posteriorfossa CongZIKA, exact

| Posterior fossa anomaly | CongZIKA |    | Total |
|-------------------------|----------|----|-------|
|                         | 0        | 1  |       |
| 0                       | 111      | 14 | 125   |
| 1                       | 0        | 4  | 4     |
| Total                   | 111      | 18 | 129   |

Fisher's exact = 0.000  
 1-sided Fisher's exact = 0.000

. tab Ventriculomegaly CongZIKA, exact

| Ventriculomegaly | CongZIKA |    | Total |
|------------------|----------|----|-------|
|                  | 0        | 1  |       |
| 0                | 110      | 14 | 124   |
| 1                | 1        | 4  | 5     |
| Total            | 111      | 18 | 129   |

Fisher's exact = 0.001  
 1-sided Fisher's exact = 0.001

. \* Neurologicimpairmentsat 2years  
 . tab Neurologicimpairmentsat2y CongZIKA, chi2

| Neurologic impairment s at 2y | CongZIKA |    | Total |
|-------------------------------|----------|----|-------|
|                               | 0        | 1  |       |
| 0                             | 92       | 10 | 102   |
| 1                             | 4        | 5  | 9     |

Total | 96 15 | 111

Pearson chi2(1) = 14.8121 Pr = 0.000

. tab Cerebralpalsyat2y CongZIKA, exact

| Cerebral<br>palsy at<br>2y | CongZIKA |    | Total |
|----------------------------|----------|----|-------|
|                            | 0        | 1  |       |
| 0                          | 96       | 13 | 109   |
| 1                          | 0        | 2  | 2     |
| Total                      | 96       | 15 | 111   |

Fisher's exact = 0.017  
1-sided Fisher's exact = 0.017

. tab Severedystoniaortremors CongZIKA, chi2

| Severe<br>dystonia<br>or tremors<br>at 2y | CongZIKA |    | Total |
|-------------------------------------------|----------|----|-------|
|                                           | 0        | 1  |       |
| 0                                         | 93       | 12 | 105   |
| 1                                         | 3        | 3  | 6     |
| Total                                     | 96       | 15 | 111   |

Pearson chi2(1) = 7.2249 Pr = 0.007

. tab Seizuresat2y CongZIKA, exact

| Seizures<br>at 2y | CongZIKA |    | Total |
|-------------------|----------|----|-------|
|                   | 0        | 1  |       |
| 0                 | 94       | 12 | 106   |
| 1                 | 2        | 3  | 5     |
| Total             | 96       | 15 | 111   |

Fisher's exact = 0.017  
1-sided Fisher's exact = 0.017

. \* Motor acquisitions  
. codebook Ageatsittingposition if CongZIKA==1

---

Ageatsittingpositionm Age at sitting  
position (m)

---

type: numeric (double)

range: [0,24]                      units: .1  
unique values: 9                      missing .: 3/18

tabulation: Freq. Value  
1 0  
1 3  
3 5  
1 5.5  
4 6  
1 7  
2 8  
1 14  
1 24  
3 .

. codebook Ageatsittingposition if CongZIKA==0

```
-----
Ageatsittingpositionm                               Age at sitting
position (m)
-----
```

type: numeric (double)

range: [4,11]                      units: .1  
unique values: 10                      missing .: 14/111

mean: 6.22165  
std. dev: 1.44692

|              |     |     |     |     |     |
|--------------|-----|-----|-----|-----|-----|
| percentiles: | 10% | 25% | 50% | 75% | 90% |
|              | 4   | 5   | 6   | 7   | 8   |

. ranksum Ageatsittingposition, by(CongZIKA)

Two-sample Wilcoxon rank-sum (Mann-Whitney) test

| CongZIKA | obs | rank sum | expected |
|----------|-----|----------|----------|
| 0        | 97  | 5508     | 5480.5   |
| 1        | 15  | 820      | 847.5    |
| combined | 112 | 6328     | 6328     |

unadjusted variance 13701.25  
adjustment for ties -671.50  
-----  
adjusted variance 13029.75

Ho: Ageats~m(CongZIKA==0) = Ageats~m(CongZIKA==1)  
z = 0.241  
Prob > |z| = 0.8096  
Exact Prob = 0.8113

. gen delaysit=0

```
. replace delaysit=1 if (Ageatsittingposition>9 and Ageatsittingposition!=.)
9andAgeatsittingposition invalid name
r(198);
```

end of do-file

```
r(198);
```

```
. do "C:\Users\lpomar\AppData\Local\Temp\STD1d6c_000000.tmp"
```

```
. replace delaysit=1 if (Ageatsittingposition>9 & Ageatsittingposition!=.)
(3 real changes made)
```

```
. tab delaysit CongZIKA, exact
```

| delaysit | CongZIKA |    | Total |
|----------|----------|----|-------|
|          | 0        | 1  |       |
| 0        | 110      | 16 | 126   |
| 1        | 1        | 2  | 3     |
| Total    | 111      | 18 | 129   |

```
Fisher's exact = 0.051
1-sided Fisher's exact = 0.051
```

```
. codebook Ageatwalkingm if CongZIKA==1
```

```
-----
Ageatwalkingm                                     Age at
walking (m)
-----
```

```
type: numeric (double)
```

```
range: [0,24]          units: .1
unique values: 9       missing .: 3/18
```

```
tabulation: Freq. Value
             1 0
             2 8
             1 9
             2 10
             4 11
             2 12
             1 12.5
             1 18
             1 24
             3 .
```

```
. codebook Ageatwalkingm if CongZIKA==0
```

```
-----
-----
```

Ageatwalkingm  
walking (m)

Age at

type: numeric (double)

range: [7,17]                    units: 1  
unique values: 11                missing .: 15/111

mean: 11.4271  
std. dev: 2.03001

percentiles:    10%    25%    50%    75%    90%  
                  9     10     11     12     14

. ranksum Ageatwalkingm, by(CongZIKA)

Two-sample Wilcoxon rank-sum (Mann-Whitney) test

| CongZIKA | obs | rank sum | expected |
|----------|-----|----------|----------|
| 0        | 96  | 5488.5   | 5376     |
| 1        | 15  | 727.5    | 840      |
| combined | 111 | 6216     | 6216     |

unadjusted variance    13440.00  
adjustment for ties    -426.93

adjusted variance    13013.07

Ho: Ageatw~m(CongZIKA==0) = Ageatw~m(CongZIKA==1)

z = 0.986

Prob > |z| = 0.3240

Exact Prob = 0.3289

. gen delaywalk=0

. replace delaywalk=1 if (Ageatwalking>18 & Ageatwalking! =.)  
(1 real change made)

. tab delaywalk CongZIKA, exact

|           | CongZIKA |    |       |
|-----------|----------|----|-------|
| delaywalk | 0        | 1  | Total |
| 0         | 111      | 17 | 128   |
| 1         | 0        | 1  | 1     |
| Total     | 111      | 18 | 129   |

Fisher's exact =            0.140  
1-sided Fisher's exact =    0.140

. \* Vision and hearing evaluation:

. tab Impairedresponsetovisualstim CongZIKA, chi2

| Impaired  <br>response  <br>to visual  <br>stimuli | CongZIKA |    | Total |
|----------------------------------------------------|----------|----|-------|
|                                                    | 0        | 1  |       |
| 0                                                  | 97       | 13 | 110   |
| 1                                                  | 1        | 2  | 3     |
| Total                                              | 98       | 15 | 113   |

Pearson chi2(1) = 7.6314 Pr = 0.006

. tab Impairedresponsetoauditorystim CongZIKA, chi2

| Impaired  <br>response  <br>to  <br>auditory  <br>stimuli | CongZIKA |    | Total |
|-----------------------------------------------------------|----------|----|-------|
|                                                           | 0        | 1  |       |
| 0                                                         | 97       | 13 | 110   |
| 1                                                         | 1        | 2  | 3     |
| Total                                                     | 98       | 15 | 113   |

Pearson chi2(1) = 7.6314 Pr = 0.006

. \* CDAS

. tab Neurodevelopment2SDat3y CongZIKA, chi2

| Neurodevel  <br>opment  <br><-2SD at  <br>3y | CongZIKA |    | Total |
|----------------------------------------------|----------|----|-------|
|                                              | 0        | 1  |       |
| 0                                            | 44       | 4  | 48    |
| 1                                            | 7        | 7  | 14    |
| Total                                        | 51       | 11 | 62    |

Pearson chi2(1) = 12.8936 Pr = 0.000

. tab Motordomain2SD CongZIKA, exact

| Motor  <br>domain  <br><-2SD | CongZIKA |    | Total |
|------------------------------|----------|----|-------|
|                              | 0        | 1  |       |
| 0                            | 50       | 9  | 59    |
| 1                            | 1        | 2  | 3     |
| Total                        | 51       | 11 | 62    |

Fisher's exact = 0.079

1-sided Fisher's exact = 0.079

. tab Congitivedomain2SD CongZIKA, chi2

| Congitive  <br>domain  <br><-2SD | CongZIKA |    | Total |
|----------------------------------|----------|----|-------|
|                                  | 0        | 1  |       |
| 0                                | 48       | 5  | 53    |
| 1                                | 3        | 6  | 9     |
| Total                            | 51       | 11 | 62    |

Pearson chi2(1) = 17.2677 Pr = 0.000

. tab Socioaffectivedomain2SD CongZIKA, chi2

| Socio-affe  <br>ctive  <br>domain | CongZIKA |    | Total |
|-----------------------------------|----------|----|-------|
|                                   | <-2SD    | 0  |       |
| 0                                 | 45       | 7  | 52    |
| 1                                 | 6        | 4  | 10    |
| Total                             | 51       | 11 | 62    |

Pearson chi2(1) = 4.0475 Pr = 0.044

. log close

name: <unnamed>

log: \\HOME\lpomar\Mes Documents\Zika\_enfants-Guyane\Nature\R1\Dataset\Tables3-4.log

log type: text

closed on: 24 Mar 2021, 20:52:26

-----

-----
